# Supplementary material for: Clinical Impact of Switching or Continuation of Apixaban or Rivaroxaban among Patients with Non-Valvular Atrial Fibrillation
Source: MDPI journal article supplement (doi:10.3390/jcm13041073), 2024-02-14
Supplement: s1 [file s1]

## Supplementary table

**Table S1** Patient characteristics of Apixaban and Rivaroxaban initiators between switchers and continuers before Propensity Score Matching

|                                              | Apixaban initiators               |       |                     |       |          | Rivaroxaban initiators            |       |                        |       |          |
|----------------------------------------------|-----------------------------------|-------|---------------------|-------|----------|-----------------------------------|-------|------------------------|-------|----------|
|                                              | Apixaban to rivaroxaban switchers |       | Apixaban continuers |       | STD<br># | Rivaroxaban to apixaban switchers |       | Rivaroxaban continuers |       | STD<br># |
|                                              | n/Mean<br>%/SD                    |       | n/Mean<br>%/SD      |       |          | n/Mean<br>%/SD                    |       | n/Mean<br>%/SD         |       |          |
| <b>Sample Size</b>                           | 2,901                             | 100%  | 132,676             | 100%  |          | 2,877                             | 100%  | 45,654                 | 100%  |          |
| <b>Age</b>                                   | 74.8                              | 9.4   | 74.8                | 9.9   | 0.3      | 74.1                              | 9.9   | 72.2                   | 10.8  | 18.5     |
| <b>Age Group*</b>                            |                                   |       |                     |       |          |                                   |       |                        |       |          |
| 18—54                                        | 92                                | 3.2%  | 4,737               | 3.6%  | 7.2      | 111                               | 3.9%  | 2,997                  | 6.6%  | 21.1     |
| 55—64                                        | 286                               | 9.9%  | 13,682              | 10.3% |          | 331                               | 11.5% | 6,835                  | 15.0% |          |
| 65—74                                        | 918                               | 31.6% | 42,314              | 31.9% |          | 899                               | 31.3% | 15,432                 | 33.8% |          |
| 75—79                                        | 595                               | 20.5% | 25,153              | 19.0% |          | 619                               | 21.5% | 7,817                  | 17.1% |          |
| ≥80                                          | 1,010                             | 34.8% | 46,790              | 35.3% |          | 917                               | 31.9% | 12,573                 | 27.5% |          |
| <b>Gender*(1)</b>                            |                                   |       |                     |       |          |                                   |       |                        |       |          |
| Female                                       | 1,475                             | 50.8% | 62,721              | 47.3% | 8.0      | 1,377                             | 47.9% | 18,682                 | 40.9% | 14.1     |
| Male                                         | 1,425                             | 49.1% | 69,940              | 52.7% |          | 1,500                             | 52.1% | 26,967                 | 59.1% |          |
| <b>Comorbidity Scores</b>                    |                                   |       |                     |       |          |                                   |       |                        |       |          |
| CCI Score*                                   | 2.7                               | 2.4   | 2.8                 | 2.5   | 2.5      | 2.9                               | 2.6   | 2.2                    | 2.2   | 29.1     |
| CHA <sub>2</sub> DS <sub>2</sub> -VASC Score | 4.1                               | 1.7   | 4.0                 | 1.7   | 2.2      | 4.1                               | 1.8   | 3.5                    | 1.7   | 31.2     |
| 0                                            | 36                                | 1.2%  | 1,976               | 1.5%  | 3.6      | 41                                | 1.4%  | 1,420                  | 3.1%  | 30.8     |
| 1                                            | 137                               | 4.7%  | 6,967               | 5.3%  |          | 154                               | 5.4%  | 4,029                  | 8.8%  |          |
| 2                                            | 356                               | 12.3% | 16,736              | 12.6% |          | 353                               | 12.3% | 7,925                  | 17.4% |          |
| 3                                            | 602                               | 20.8% | 26,436              | 19.9% |          | 579                               | 20.1% | 10,001                 | 21.9% |          |
| ≥4                                           | 1,770                             | 61.0% | 80,561              | 60.7% |          | 1,750                             | 60.8% | 22,279                 | 48.8% |          |
| HAS-BLED Score<br>(2)                        | 2.9                               | 1.3   | 2.8                 | 1.3   | 1.6      | 3.0                               | 1.3   | 2.5                    | 1.3   | 39.4     |
| 0                                            | 55                                | 1.9%  | 2,803               | 2.1%  | 0.0      | 54                                | 1.9%  | 1,782                  | 3.9%  | 38.3     |
| 1                                            | 339                               | 11.7% | 15,744              | 11.9% |          | 295                               | 10.3% | 8,002                  | 17.5% |          |

|                                  | Apixaban initiators               |       |                     |       |          | Rivaroxaban initiators            |       |                        |       |          |
|----------------------------------|-----------------------------------|-------|---------------------|-------|----------|-----------------------------------|-------|------------------------|-------|----------|
|                                  | Apixaban to rivaroxaban switchers |       | Apixaban continuers |       | STD<br># | Rivaroxaban to apixaban switchers |       | Rivaroxaban continuers |       | STD<br># |
|                                  | n/Mean %/SD                       |       | n/Mean %/SD         |       |          | n/Mean %/SD                       |       | n/Mean %/SD            |       |          |
| 2                                | 851                               | 29.3% | 38,766              | 29.2% |          | 729                               | 25.3% | 14,853                 | 32.5% |          |
| ≥3                               | 1,656                             | 57.1% | 75,363              | 56.8% |          | 1,799                             | 62.5% | 21,017                 | 46.0% |          |
| <b>Baseline Comorbidities</b>    |                                   |       |                     |       |          |                                   |       |                        |       |          |
| Any bleeding history*            | 453                               | 15.6% | 18,543              | 14.0% | 4.6      | 813                               | 28.3% | 6,148                  | 13.5% | 37.0     |
| Congestive heart failure*        | 831                               | 28.7% | 40,009              | 30.2% | 3.3      | 979                               | 34.0% | 10,979                 | 24.1% | 22.1     |
| Diabetes*                        | 941                               | 32.4% | 46,403              | 35.0% | 5.4      | 951                               | 33.1% | 14,642                 | 32.1% | 2.1      |
| Hypertension*                    | 2,478                             | 85.4% | 113,496             | 85.5% | 0.4      | 2,505                             | 87.1% | 37,085                 | 81.2% | 16.0     |
| Renal disease*                   | 786                               | 27.1% | 39,176              | 29.5% | 5.4      | 900                               | 31.3% | 9,104                  | 19.9% | 26.2     |
| Liver disease*                   | 166                               | 5.7%  | 7,134               | 5.4%  | 1.5      | 186                               | 6.5%  | 1,951                  | 4.3%  | 9.7      |
| Myocardial infarction*           | 335                               | 11.6% | 15,800              | 11.9% | 1.1      | 364                               | 12.7% | 3,932                  | 8.6%  | 13.1     |
| Dyspepsia or Stomach discomfort* | 402                               | 13.9% | 15,768              | 11.9% | 5.9      | 346                               | 12.0% | 3,600                  | 7.9%  | 13.9     |
| Peripheral vascular disease*     | 766                               | 26.4% | 33,304              | 25.1% | 3.0      | 730                               | 25.4% | 9,288                  | 20.3% | 12.0     |
| Transient ischemic attack*       | 410                               | 14.1% | 16,829              | 12.7% | 4.3      | 370                               | 12.9% | 3,749                  | 8.2%  | 15.2     |
| Alcoholism*                      | 87                                | 3.0%  | 3,468               | 2.6%  | 2.3      | 77                                | 2.7%  | 1,108                  | 2.4%  | 1.6      |
| Peripheral arterial disease*     | 408                               | 14.1% | 16,799              | 12.7% | 4.1      | 380                               | 13.2% | 5,000                  | 11.0% | 6.9      |
| Coronary artery disease*         | 1,158                             | 39.9% | 53,736              | 40.5% | 1.2      | 1,185                             | 41.2% | 15,926                 | 34.9% | 13.0     |
| Stroke/SE*                       | 353                               | 12.2% | 14,352              | 10.8% | 4.2      | 313                               | 10.9% | 3,275                  | 7.2%  | 13.0     |
| All-cause Hospitalization        | 1,118                             | 38.5% | 47,793              | 36.0% | 5.2      | 1,197                             | 41.6% | 12,078                 | 26.5% | 32.4     |
| <b>Time to switch*</b>           | 145.7                             | 207.4 | 136.5               | 179.1 | 4.8      | 224.8                             | 332.6 | 193.2                  | 259.0 | 10.6     |

|                                                         | Apixaban initiators               |       |                     |       |          | Rivaroxaban initiators            |       |                        |       |          |
|---------------------------------------------------------|-----------------------------------|-------|---------------------|-------|----------|-----------------------------------|-------|------------------------|-------|----------|
|                                                         | Apixaban to rivaroxaban switchers |       | Apixaban continuers |       | STD<br># | Rivaroxaban to apixaban switchers |       | Rivaroxaban continuers |       | STD<br># |
|                                                         | n/Mean %/SD                       |       | n/Mean %/SD         |       |          | n/Mean %/SD                       |       | n/Mean %/SD            |       |          |
| Event after DOAC initiation before index date*          |                                   |       |                     |       |          |                                   |       |                        |       |          |
| Stroke/SE event after OAC initiation before index date* | 44                                | 1.5%  | 393                 | 0.3%  | 12.9     | 66                                | 2.3%  | 104                    | 0.2%  | 18.6     |
| MB event after OAC initiation before index date*        | 32                                | 1.1%  | 953                 | 0.7%  | 4.1      | 155                               | 5.4%  | 445                    | 1.0%  | 25.4     |
| Dosage**                                                |                                   |       |                     |       |          |                                   |       |                        |       |          |
| Low dose                                                | 463                               | 16.0% | 24,537              | 18.5% |          | 679                               | 23.6% | 8,806                  | 19.3% |          |
| Standard dose                                           | 2,438                             | 84.0% | 108,139             | 81.5% | 25.8     | 2,135                             | 74.2% | 36,154                 | 79.2% | 22.1     |
| Other                                                   | 0                                 | 0.0%  | 0                   | 0.0%  |          | 63                                | 2.2%  | 694                    | 1.5%  |          |
| Follow-up duration in days <sup>(3)</sup>               |                                   |       |                     |       |          |                                   |       |                        |       |          |
|                                                         | 313.8                             | 348.2 | 385.9               | 410.8 | 18.9     | 377.7                             | 445.3 | 359.4                  | 432.8 | 4.2      |

**Abbreviations:** CCI, Charlson Comorbidity Index; CHA<sub>2</sub>DS<sub>2</sub>-VASC, Congestive heart failure, Hypertension, Age ≥ 75 years, Diabetes, Stroke, Vascular disease, Age 65–74 years, Sex; DOAC, Direct Oral Anticoagulants; HAS-BLED, Hypertension, Abnormal renal/liver function, Stroke, Bleeding history or predisposition, Labile international normalized ratio, Elderly, Drugs/alcohol; MB, Major Bleeding; OAC, Oral Anticoagulants; SD, Standard Deviation; SE, Systemic Embolism; STD, Standardized mean Difference;

#STD Difference=100 × |actual STD diff|. STD Difference greater than 10 is considered significant.

\*Variables used for PS matching.

<sup>(1)</sup> Sixteen patients with unknown gender were observed from apixaban initiators and five patients with unknown gender were observed from rivaroxaban initiators

<sup>(2)</sup> Because the international normalized ratio value was not available in the database, a modified HAS-BLED score was calculated with a range of 0 to 8

<sup>(3)</sup> Follow-up duration is defined from the day after the index date to the earliest of treatment end, death, enrolment end, or study end

\*\*Apixaban low dose: 2.5mg, apixaban standard dose 5mg; rivaroxaban low dose 10mg, 15mg, rivaroxaban standard dose 20mg, the dosage is considered as of the initiation DOAC.

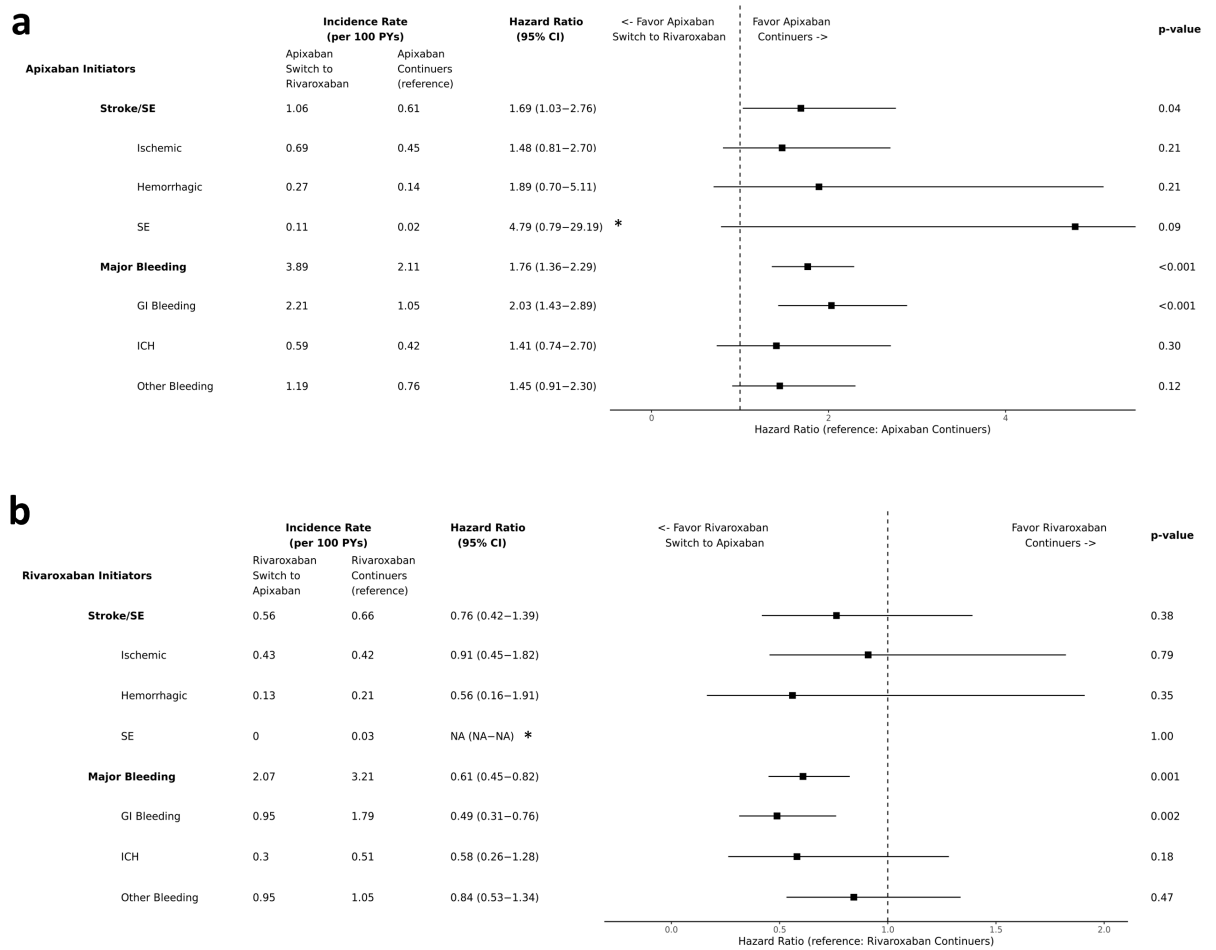

**Figure S1. (a)** Comparison of risks of stroke/SE and MB between apixaban to rivaroxaban switchers and apixaban continuers among apixaban initiators - standard dose. \* CI for SE was truncated **(b)** Comparison of risks of stroke/SE and MB between rivaroxaban to apixaban switchers and rivaroxaban continuers among rivaroxaban initiators - standard dose. \* Proper Hazard ratio and CI were not obtained due to one group has 0 event. Abbreviation: SE - systemic embolism; GI - gastrointestinal; ICH - intracranial hemorrhage; MB: major bleeding; CI - confidence interval; PYs: person-years

**Table S2** Study codes used to identify MB and Stroke

| Code Type | Code  | Diagnosis          | ICD type | Description                                                                                                                                   |
|-----------|-------|--------------------|----------|-----------------------------------------------------------------------------------------------------------------------------------------------|
| Diagnosis | I6001 | Hemorrhagic stroke | ICD10    | Nontraumatic Subarachnoid Hemorrhage From Right Carotid Siphon And Bifurcation Or Ntrm Subarach Hemor From Right Carotid Siphon And Bifurc    |
| Diagnosis | I6002 | Hemorrhagic stroke | ICD10    | Nontraumatic Subarachnoid Hemorrhage From Left Carotid Siphon And Bifurcation Or Ntrm Subarach Hemorrhage From Left Carotid Siphon And Bifurc |

|           |       |                    |       |                                                                                                                                                      |
|-----------|-------|--------------------|-------|------------------------------------------------------------------------------------------------------------------------------------------------------|
| Diagnosis | I6010 | Hemorrhagic stroke | ICD10 | Nontraumatic Subarachnoid Hemorrhage From Unspecified Middle Cerebral Artery Or Ntrm Subarach Hemorrhage From Unsp Middle Cerebral Artery            |
| Diagnosis | I6011 | Hemorrhagic stroke | ICD10 | Nontraumatic Subarachnoid Hemorrhage From Right Middle Cerebral Artery Or Ntrm Subarach Hemorrhage From Right Middle Cerebral Artery                 |
| Diagnosis | I6012 | Hemorrhagic stroke | ICD10 | Nontraumatic Subarachnoid Hemorrhage From Left Middle Cerebral Artery Or Ntrm Subarach Hemorrhage From Left Middle Cerebral Artery                   |
| Diagnosis | I602  | Hemorrhagic stroke | ICD10 | Nontraumatic Subarachnoid Hemorrhage From Anterior Communicating Artery                                                                              |
| Diagnosis | I6030 | Hemorrhagic stroke | ICD10 | Nontraumatic Subarachnoid Hemorrhage From Unspecified Posterior Communicating Artery Or Ntrm Subarach Hemor From Unsp Posterior Communicating Artery |
| Diagnosis | I6031 | Hemorrhagic stroke | ICD10 | Nontraumatic Subarachnoid Hemorrhage From Right Posterior Communicating Artery Or Ntrm Subarach Hemor From Right Post Communicating Artery           |
| Diagnosis | I6032 | Hemorrhagic stroke | ICD10 | Nontraumatic Subarachnoid Hemorrhage From Left Posterior Communicating Artery Or Ntrm Subarach Hemor From Left Posterior Communicating Artery        |
| Diagnosis | I604  | Hemorrhagic stroke | ICD10 | Nontraumatic Subarachnoid Hemorrhage From Basilar Artery                                                                                             |
| Diagnosis | I6050 | Hemorrhagic stroke | ICD10 | Nontraumatic Subarachnoid Hemorrhage From Unsp Verteb Art Or Nontraumatic Subarachnoid Hemorrhage From Unspecified Vertebral Artery                  |
| Diagnosis | I6051 | Hemorrhagic stroke | ICD10 | Nontraumatic Subarachnoid Hemorrhage From R Verteb Art Or Nontraumatic Subarachnoid Hemorrhage From Right Vertebral Artery                           |
| Diagnosis | I6052 | Hemorrhagic stroke | ICD10 | Nontraumatic Subarachnoid Hemorrhage From L Verteb Art Or Nontraumatic Subarachnoid Hemorrhage From Left Vertebral Artery                            |
| Diagnosis | I606  | Hemorrhagic stroke | ICD10 | Nontraumatic Subarachnoid Hemorrhage From Oth Intracran Art Or Nontraumatic Subarachnoid Hemorrhage From Other Intracranial Arteries                 |
| Diagnosis | I607  | Hemorrhagic stroke | ICD10 | Nontraumatic Subarachnoid Hemorrhage From Unsp Intracran Art Or Nontraumatic Subarachnoid Hemorrhage From Unspecified Intracranial Artery            |
| Diagnosis | I608  | Hemorrhagic stroke | ICD10 | Other Nontraumatic Subarachnoid Hemorrhage                                                                                                           |
| Diagnosis | I609  | Hemorrhagic stroke | ICD10 | Nontraumatic Subarachnoid Hemorrhage, Unspecified                                                                                                    |
| Diagnosis | I610  | Hemorrhagic stroke | ICD10 | Nontraumatic Interbl Hemorrhage In Hemisphere, Subcortical Or Nontraumatic Intracerebral Hemorrhage In Hemisphere, Subcortical                       |
| Diagnosis | I611  | Hemorrhagic stroke | ICD10 | Nontraumatic Interbl Hemorrhage In Hemisphere, Cortical Or Nontraumatic Intracerebral Hemorrhage In Hemisphere, Cortical                             |

|           |        |                    |       |                                                                                                                                       |
|-----------|--------|--------------------|-------|---------------------------------------------------------------------------------------------------------------------------------------|
| Diagnosis | I612   | Hemorrhagic stroke | ICD10 | Nontraumatic Intracerebral Hemorrhage In Hemisphere, Unsp Or Nontraumatic Intracerebral Hemorrhage In Hemisphere, Unspecified         |
| Diagnosis | I613   | Hemorrhagic stroke | ICD10 | Nontraumatic Intracerebral Hemorrhage In Brain Stem                                                                                   |
| Diagnosis | I614   | Hemorrhagic stroke | ICD10 | Nontraumatic Intracerebral Hemorrhage In Cerebellum                                                                                   |
| Diagnosis | I615   | Hemorrhagic stroke | ICD10 | Nontraumatic Intracerebral Hemorrhage, Intraventricular                                                                               |
| Diagnosis | I616   | Hemorrhagic stroke | ICD10 | Nontraumatic Intracerebral Hemorrhage, Multiple Localized                                                                             |
| Diagnosis | I618   | Hemorrhagic stroke | ICD10 | Other Nontraumatic Intracerebral Hemorrhage                                                                                           |
| Diagnosis | I619   | Hemorrhagic stroke | ICD10 | Nontraumatic Intracerebral Hemorrhage, Unspecified                                                                                    |
| Diagnosis | 430    | Hemorrhagic stroke | ICD9  | Subarachnoid Hemorrhage                                                                                                               |
| Diagnosis | 431    | Hemorrhagic stroke | ICD9  | Intracerebral Hemorrhage                                                                                                              |
| Diagnosis | 4320   | Hemorrhagic stroke | ICD9  | Nontraum Extradural Hem                                                                                                               |
| Diagnosis | 4321   | Hemorrhagic stroke | ICD9  | Subdural Hemorrhage                                                                                                                   |
| Diagnosis | 4329   | Hemorrhagic stroke | ICD9  | Intracranial Hemorr Nos                                                                                                               |
| Diagnosis | I6300  | Ischemic stroke    | ICD10 | Cerebral Infarction Due To Thombos Unsp Precerebral Artery Or Cerebral Infarction Due To Thrombosis Of Unspecified Precerebral Artery |
| Diagnosis | I63011 | Ischemic stroke    | ICD10 | Cerebral Infarction Due To Thrombosis Of R Verteb Art Or Cerebral Infarction Due To Thrombosis Of Right Vertebral Artery              |
| Diagnosis | I63012 | Ischemic stroke    | ICD10 | Cerebral Infarction Due To Thrombosis Of L Verteb Art Or Cerebral Infarction Due To Thrombosis Of Left Vertebral Artery               |
| Diagnosis | I63013 | Ischemic stroke    | ICD10 | Cerebral Infarction Due To Thrombosis Of Bilateral Vertebral Arteries                                                                 |
| Diagnosis | I63019 | Ischemic stroke    | ICD10 | Cerebral Infarction Due To Thombos Unsp Vertebral Artery Or Cerebral Infarction Due To Thrombosis Of Unspecified Vertebral Artery     |
| Diagnosis | I6302  | Ischemic stroke    | ICD10 | Cerebral Infarction Due To Thrombosis Of Basilar Artery                                                                               |
| Diagnosis | I63031 | Ischemic stroke    | ICD10 | Cerebral Infarction Due To Thrombosis Of Right Carotid Artery Or Cerebral Infrc Due To Thrombosis Of Right Carotid Artery             |
| Diagnosis | I63032 | Ischemic stroke    | ICD10 | Cerebral Infarction Due To Thrombosis Of Left Carotid Artery                                                                          |

|           |        |                 |       |                                                                                                                                                                                                                                                   |
|-----------|--------|-----------------|-------|---------------------------------------------------------------------------------------------------------------------------------------------------------------------------------------------------------------------------------------------------|
| Diagnosis | I63033 | Ischemic stroke | ICD10 | Cerebral Infarction Due To Thrombosis Of Bilateral Carotid Arteries                                                                                                                                                                               |
| Diagnosis | I63039 | Ischemic stroke | ICD10 | Cerebral Infarction Due To Thrombosis Of Unsp Carotid Artery Or Cerebral Infarction Due To Thrombosis Of Unspecified Carotid Artery                                                                                                               |
| Diagnosis | I6309  | Ischemic stroke | ICD10 | Cerebral Infarction Due To Thrombosis Of Other Precerebral Artery Or Cerebral Infarction Due To Thrombosis Of Precerebral Artery                                                                                                                  |
| Diagnosis | I6310  | Ischemic stroke | ICD10 | Cerebral Infarction Due To Embolism Of Unsp Precerb Artery Or Cerebral Infarction Due To Embolism Of Unspecified Precerebral Artery                                                                                                               |
| Diagnosis | I63111 | Ischemic stroke | ICD10 | Cerebral Infarction Due To Embolism Of R Verteb Art Or Cerebral Infarction Due To Embolism Of Right Vertebral Artery                                                                                                                              |
| Diagnosis | I63112 | Ischemic stroke | ICD10 | Cerebral Infarction Due To Embolism Of Left Vertebral Artery                                                                                                                                                                                      |
| Diagnosis | I63113 | Ischemic stroke | ICD10 | Cerebral Infarction Due To Embolism Of Bilateral Vertebral Arteries                                                                                                                                                                               |
| Diagnosis | I63119 | Ischemic stroke | ICD10 | Cerebral Infarction Due To Embolism Of Unsp Vertebral Artery Or Cerebral Infarction Due To Embolism Of Unspecified Vertebral Artery                                                                                                               |
| Diagnosis | I6312  | Ischemic stroke | ICD10 | Cerebral Infarction Due To Embolism Of Basilar Artery                                                                                                                                                                                             |
| Diagnosis | I63131 | Ischemic stroke | ICD10 | Cerebral Infarction Due To Embolism Of Right Carotid Artery                                                                                                                                                                                       |
| Diagnosis | I63132 | Ischemic stroke | ICD10 | Cerebral Infarction Due To Embolism Of Left Carotid Artery                                                                                                                                                                                        |
| Diagnosis | I63133 | Ischemic stroke | ICD10 | Cerebral Infarction Due To Embolism Of Bilateral Carotid Arteries                                                                                                                                                                                 |
| Diagnosis | I63139 | Ischemic stroke | ICD10 | Cerebral Infarction Due To Embolism Of Unsp Carotid Artery Or Cerebral Infarction Due To Embolism Of Unspecified Carotid Artery                                                                                                                   |
| Diagnosis | I6319  | Ischemic stroke | ICD10 | Cerebral Infarction Due To Embolism Of Other Precerebral Artery Or Cerebral Infarction Due To Embolism Of Precerebral Artery                                                                                                                      |
| Diagnosis | I6320  | Ischemic stroke | ICD10 | Cereb Infrc Due To Unsp Occls Or Stenos Of Unsp Precerb Art Or Cerebral Infarction Due To Unspecified Occlusion Or Stenosis Of Unspecified Precerebral Arteries                                                                                   |
| Diagnosis | I63211 | Ischemic stroke | ICD10 | Cereb Infrc Due To Unsp Occls Or Stenos Of Right Verteb Art Or Cerebral Infarction Due To Unspecified Occlusion Or Stenosis Of Right Vertebral Arteries Or Cerebral Infarction Due To Unspecified Occlusion Or Stenosis Of Right Vertebral Artery |
| Diagnosis | I63212 | Ischemic stroke | ICD10 | Cereb Infrc Due To Unsp Occls Or Stenosis Of Left Verteb Art Or Cerebral Infarction Due To Unspecified Occlusion Or Stenosis Of Left Vertebral Arteries Or Cerebral Infarction Due To Unspecified Occlusion Or Stenosis Of Left Vertebral Artery  |

|           |        |                 |       |                                                                                                                                                                                                                                                                |
|-----------|--------|-----------------|-------|----------------------------------------------------------------------------------------------------------------------------------------------------------------------------------------------------------------------------------------------------------------|
| Diagnosis | I63213 | Ischemic stroke | ICD10 | Cerebral Infarction Due To Unspecified Occlusion Or Stenosis Of Bilateral Vertebral Arteries                                                                                                                                                                   |
| Diagnosis | I63219 | Ischemic stroke | ICD10 | Cereb Infrc Due To Unsp Occls Or Stenosis Of Unsp Verteb Art Or Cerebral Infarction Due To Unspecified Occlusion Or Stenosis Of Unspecified Vertebral Arteries Or Cerebral Infarction Due To Unspecified Occlusion Or Stenosis Of Unspecified Vertebral Artery |
| Diagnosis | I6322  | Ischemic stroke | ICD10 | Cerebral Infarction Due To Unspecified Occlusion Or Stenosis Of Basilar Arteries Or Cerebral Infarction Due To Unspecified Occlusion Or Stenosis Of Basilar Artery Or Cerebral Infrc Due To Unsp Occls Or Stenosis Of Basilar Art                              |
| Diagnosis | I63231 | Ischemic stroke | ICD10 | Cereb Infrc Due To Unsp Occls Or Stenos Of Right Carotid Art Or Cerebral Infarction Due To Unspecified Occlusion Or Stenosis Of Right Carotid Arteries                                                                                                         |
| Diagnosis | I63232 | Ischemic stroke | ICD10 | Cereb Infrc Due To Unsp Occls Or Stenos Of Left Carotid Art Or Cerebral Infarction Due To Unspecified Occlusion Or Stenosis Of Left Carotid Arteries                                                                                                           |
| Diagnosis | I63233 | Ischemic stroke | ICD10 | Cerebral Infarction Due To Unspecified Occlusion Or Stenosis Of Bilateral Carotid Arteries                                                                                                                                                                     |
| Diagnosis | I63239 | Ischemic stroke | ICD10 | Cereb Infrc Due To Unsp Occls Or Stenos Of Unsp Carotid Art Or Cerebral Infarction Due To Unspecified Occlusion Or Stenosis Of Unspecified Carotid Arteries Or Cerebral Infarction Due To Unspecified Occlusion Or Stenosis Of Unspecified Carotid Artery      |
| Diagnosis | I6329  | Ischemic stroke | ICD10 | Cerebral Infarction Due To Unspecified Occlusion Or Stenosis Of Other Precerebral Arteries Or Cerebral Infrc Due To Unsp Occls Or Stenosis Of Precerb Art                                                                                                      |
| Diagnosis | I6330  | Ischemic stroke | ICD10 | Cerebral Infarction Due To Thombos Unsp Cerebral Artery Or Cerebral Infarction Due To Thrombosis Of Unspecified Cerebral Artery                                                                                                                                |
| Diagnosis | I63311 | Ischemic stroke | ICD10 | Cereb Infrc Due To Thombos Of Right Middle Cerebral Artery Or Cerebral Infarction Due To Thrombosis Of Right Middle Cerebral Artery                                                                                                                            |
| Diagnosis | I63312 | Ischemic stroke | ICD10 | Cerebral Infarction Due To Thrombosis Of Left Middle Cerebral Artery Or Cerebral Infrc Due To Thombos Of Left Middle Cerebral Artery                                                                                                                           |
| Diagnosis | I63313 | Ischemic stroke | ICD10 | Cerebral Infarction Due To Thrombosis Of Bilateral Middle Cerebral Arteries                                                                                                                                                                                    |
| Diagnosis | I63319 | Ischemic stroke | ICD10 | Cerebral Infarction Due To Thrombosis Of Unspecified Middle Cerebral Artery Or Cerebral Infrc Due To Thombos Unsp Middle Cerebral Artery                                                                                                                       |
| Diagnosis | I63321 | Ischemic stroke | ICD10 | Cerebral Infarction Due To Thrombosis Of Right Anterior Cerebral Artery Or Cerebral Infrc Due To Thombos Of Right Ant Cerebral Artery                                                                                                                          |
| Diagnosis | I63322 | Ischemic stroke | ICD10 | Cerebral Infarction Due To Thrombosis Of Left Anterior Cerebral Artery Or Cerebral Infrc Due To Thombos Of Left Ant Cerebral Artery                                                                                                                            |



|           |        |                 |       |                                                                                                                                                                                                                                   |
|-----------|--------|-----------------|-------|-----------------------------------------------------------------------------------------------------------------------------------------------------------------------------------------------------------------------------------|
| Diagnosis | I63323 | Ischemic stroke | ICD10 | Cerebral Infarction Due To Thrombosis Of Bilateral Anterior Arteries Or Cerebral Infarction Due To Thrombosis Of Bilateral Anterior Cerebral Arteries                                                                             |
| Diagnosis | I63329 | Ischemic stroke | ICD10 | Cerebral Infarction Due To Thrombosis Of Unspecified Anterior Cerebral Artery Or Cerebral Infrc Due To Thombos Unsp Anterior Cerebral Artery                                                                                      |
| Diagnosis | I63331 | Ischemic stroke | ICD10 | Cerebral Infarction Due To Thrombosis Of Right Posterior Cerebral Artery Or Cerebral Infrc Due To Thombos Of Right Post Cerebral Artery                                                                                           |
| Diagnosis | I63332 | Ischemic stroke | ICD10 | Cerebral Infarction Due To Thrombosis Of Left Posterior Cerebral Artery Or Cerebral Infrc Due To Thombos Of Left Post Cerebral Artery                                                                                             |
| Diagnosis | I63333 | Ischemic stroke | ICD10 | Cerebral Infarction Due To Thrombosis Of Bilateral Posterior Cerebral Arteries Or Cerebral Infarction To Thrombosis Of Bilateral Posterior Arteries Or Cerebral Infarction To Thrombosis Of Bilateral Posterior Cerebral Arteries |
| Diagnosis | I63339 | Ischemic stroke | ICD10 | Cerebral Infarction Due To Thrombosis Of Unspecified Posterior Cerebral Artery Or Cerebral Infrc Due To Thombos Unsp Posterior Cerebral Artery                                                                                    |
| Diagnosis | I63341 | Ischemic stroke | ICD10 | Cerebral Infarction Due To Thrombosis Of Right Cerebellar Artery Or Cerebral Infrc Due To Thrombosis Of Right Cereblr Artery                                                                                                      |
| Diagnosis | I63342 | Ischemic stroke | ICD10 | Cerebral Infarction Due To Thrombosis Of Left Cerebellar Artery Or Cerebral Infarction Due To Thrombosis Of Left Cereblr Artery                                                                                                   |
| Diagnosis | I63343 | Ischemic stroke | ICD10 | Cerebral Infarction Due To Thrombosis Of Bilateral Cerebellar Arteries Or Cerebral Infarction To Thrombosis Of Bilateral Cerebellar Arteries                                                                                      |
| Diagnosis | I63349 | Ischemic stroke | ICD10 | Cerebral Infarction Due To Thombos Unsp Cerebellar Artery Or Cerebral Infarction Due To Thrombosis Of Unspecified Cerebellar Artery                                                                                               |
| Diagnosis | I6339  | Ischemic stroke | ICD10 | Cerebral Infarction Due To Thrombosis Of Oth Cerebral Artery Or Cerebral Infarction Due To Thrombosis Of Other Cerebral Artery                                                                                                    |
| Diagnosis | I6340  | Ischemic stroke | ICD10 | Cerebral Infarction Due To Embolism Of Unsp Cerebral Artery Or Cerebral Infarction Due To Embolism Of Unspecified Cerebral Artery                                                                                                 |
| Diagnosis | I63411 | Ischemic stroke | ICD10 | Cereb Infrc Due To Embolism Of Right Middle Cerebral Artery Or Cerebral Infarction Due To Embolism Of Right Middle Cerebral Artery                                                                                                |
| Diagnosis | I63412 | Ischemic stroke | ICD10 | Cereb Infrc Due To Embolism Of Left Middle Cerebral Artery Or Cerebral Infarction Due To Embolism Of Left Middle Cerebral Artery                                                                                                  |
| Diagnosis | I63413 | Ischemic stroke | ICD10 | Cerebral Infarction Due To Embolism Of Bilateral Middle Cerebral Arteries                                                                                                                                                         |

|           |        |                 |       |                                                                                                                                                             |
|-----------|--------|-----------------|-------|-------------------------------------------------------------------------------------------------------------------------------------------------------------|
| Diagnosis | I63419 | Ischemic stroke | ICD10 | Cereb Infrc Due To Embolism Of Unsp Middle Cerebral Artery Or Cerebral Infarction Due To Embolism Of Unspecified Middle Cerebral Artery                     |
| Diagnosis | I63421 | Ischemic stroke | ICD10 | Cerebral Infarction Due To Embolism Of Right Anterior Cerebral Artery Or Cerebral Infrc Due To Embolism Of Right Ant Cerebral Artery                        |
| Diagnosis | I63422 | Ischemic stroke | ICD10 | Cerebral Infarction Due To Embolism Of Left Anterior Cerebral Artery Or Cerebral Infrc Due To Embolism Of Left Ant Cerebral Artery                          |
| Diagnosis | I63423 | Ischemic stroke | ICD10 | Cerebral Infarction Due To Embolism Of Bilateral Anterior Cerebral Arteries                                                                                 |
| Diagnosis | I63429 | Ischemic stroke | ICD10 | Cerebral Infarction Due To Embolism Of Unspecified Anterior Cerebral Artery Or Cerebral Infrc Due To Embolism Of Unsp Ant Cerebral Artery                   |
| Diagnosis | I63431 | Ischemic stroke | ICD10 | Cerebral Infarction Due To Embolism Of Right Posterior Cerebral Artery Or Cerebral Infrc Due To Embolism Of Right Post Cerebral Artery                      |
| Diagnosis | I63432 | Ischemic stroke | ICD10 | Cerebral Infarction Due To Embolism Of Left Posterior Cerebral Artery Or Cerebral Infrc Due To Embolism Of Left Post Cerebral Artery                        |
| Diagnosis | I63433 | Ischemic stroke | ICD10 | Cerebral Infarction Due To Embolism Of Bilateral Posterior Cerebral Arteries                                                                                |
| Diagnosis | I63439 | Ischemic stroke | ICD10 | Cerebral Infarction Due To Embolism Of Unspecified Posterior Cerebral Artery Or Cerebral Infrc Due To Embolism Of Unsp Post Cerebral Artery                 |
| Diagnosis | I63441 | Ischemic stroke | ICD10 | Cerebral Infarction Due To Embolism Of Right Cerebellar Artery Or Cerebral Infarction Due To Embolism Of Right Cereblr Artery                               |
| Diagnosis | I63442 | Ischemic stroke | ICD10 | Cerebral Infarction Due To Embolism Of Left Cerebellar Artery Or Cerebral Infarction Due To Embolism Of Left Cereblr Artery                                 |
| Diagnosis | I63443 | Ischemic stroke | ICD10 | Cerebral Infarction Due To Embolism Of Bilateral Cerebellar Arteries                                                                                        |
| Diagnosis | I63449 | Ischemic stroke | ICD10 | Cerebral Infarction Due To Embolism Of Unsp Cereblr Artery Or Cerebral Infarction Due To Embolism Of Unspecified Cerebellar Artery                          |
| Diagnosis | I6349  | Ischemic stroke | ICD10 | Cerebral Infarction Due To Embolism Of Other Cerebral Artery                                                                                                |
| Diagnosis | I6350  | Ischemic stroke | ICD10 | Cereb Infrc Due To Unsp Occls Or Stenos Of Unsp Cereb Artery Or Cerebral Infarction Due To Unspecified Occlusion Or Stenosis Of Unspecified Cerebral Artery |
| Diagnosis | I63511 | Ischemic stroke | ICD10 | Cereb Infrc D/T Unsp Occls Or Stenos Of Right Mid Cereb Art Or Cerebral Infarction Due To Unspecified Occlusion Or Stenosis Of Right Middle Cerebral Artery |
| Diagnosis | I63512 | Ischemic stroke | ICD10 | Cereb Infrc D/T Unsp Occls Or Stenos Of Left Mid Cereb Art Or Cerebral Infarction Due To Unspecified Occlusion Or Stenosis Of Left Middle Cerebral Artery   |

|           |        |                 |       |                                                                                                                                                                                                       |
|-----------|--------|-----------------|-------|-------------------------------------------------------------------------------------------------------------------------------------------------------------------------------------------------------|
| Diagnosis | I63513 | Ischemic stroke | ICD10 | Cerebral Infarction Due To Unspecified Occlusion Or Stenosis Of Bilateral Middle Arteries Or Cerebral Infarction Due To Unspecified Occlusion Or Stenosis Of Bilateral Middle Cerebral Arteries       |
| Diagnosis | I63519 | Ischemic stroke | ICD10 | Cereb Infrc D/T Unsp Occls Or Stenos Of Unsp Mid Cereb Art Or Cerebral Infarction Due To Unspecified Occlusion Or Stenosis Of Unspecified Middle Cerebral Artery                                      |
| Diagnosis | I63521 | Ischemic stroke | ICD10 | Cereb Infrc D/T Unsp Occls Or Stenos Of Right Ant Cereb Art Or Cerebral Infarction Due To Unspecified Occlusion Or Stenosis Of Right Anterior Cerebral Artery                                         |
| Diagnosis | I63522 | Ischemic stroke | ICD10 | Cereb Infrc D/T Unsp Occls Or Stenos Of Left Ant Cereb Art Or Cerebral Infarction Due To Unspecified Occlusion Or Stenosis Of Left Anterior Cerebral Artery                                           |
| Diagnosis | I63523 | Ischemic stroke | ICD10 | Cerebral Infarction Due To Unspecified Occlusion Or Stenosis Of Bilateral Anterior Arteries Or Cerebral Infarction Due To Unspecified Occlusion Or Stenosis Of Bilateral Anterior Cerebral Arteries   |
| Diagnosis | I63529 | Ischemic stroke | ICD10 | Cereb Infrc D/T Unsp Occls Or Stenos Of Unsp Ant Cereb Art Or Cerebral Infarction Due To Unspecified Occlusion Or Stenosis Of Unspecified Anterior Cerebral Artery                                    |
| Diagnosis | I63531 | Ischemic stroke | ICD10 | Cereb Infrc D/T Unsp Occls Or Stenos Of Right Post Cereb Art Or Cerebral Infarction Due To Unspecified Occlusion Or Stenosis Of Right Posterior Cerebral Artery                                       |
| Diagnosis | I63532 | Ischemic stroke | ICD10 | Cereb Infrc D/T Unsp Occls Or Stenos Of Left Post Cereb Art Or Cerebral Infarction Due To Unspecified Occlusion Or Stenosis Of Left Posterior Cerebral Artery                                         |
| Diagnosis | I63533 | Ischemic stroke | ICD10 | Cerebral Infarction Due To Unspecified Occlusion Or Stenosis Of Bilateral Posterior Arteries Or Cerebral Infarction Due To Unspecified Occlusion Or Stenosis Of Bilateral Posterior Cerebral Arteries |
| Diagnosis | I63539 | Ischemic stroke | ICD10 | Cereb Infrc D/T Unsp Occls Or Stenos Of Unsp Post Cereb Art Or Cerebral Infarction Due To Unspecified Occlusion Or Stenosis Of Unspecified Posterior Cerebral Artery                                  |
| Diagnosis | I63541 | Ischemic stroke | ICD10 | Cereb Infrc Due To Unsp Occls Or Stenos Of Right Cereblr Art Or Cerebral Infarction Due To Unspecified Occlusion Or Stenosis Of Right Cerebellar Artery                                               |
| Diagnosis | I63542 | Ischemic stroke | ICD10 | Cereb Infrc Due To Unsp Occls Or Stenos Of Left Cereblr Art Or Cerebral Infarction Due To Unspecified Occlusion Or Stenosis Of Left Cerebellar Artery                                                 |
| Diagnosis | I63543 | Ischemic stroke | ICD10 | Cerebral Infarction Due To Unspecified Occlusion Or Stenosis Of Bilateral Cerebellar Arteries                                                                                                         |
| Diagnosis | I63549 | Ischemic stroke | ICD10 | Cereb Infrc Due To Unsp Occls Or Stenos Of Unsp Cereblr Art Or Cerebral Infarction Due To Unspecified Occlusion Or Stenosis Of Unspecified Cerebellar Artery                                          |
| Diagnosis | I6359  | Ischemic stroke | ICD10 | Cereb Infrc Due To Unsp Occls Or Stenosis Of Cerebral Artery Or Cerebral Infarction Due To Unspecified Occlusion Or Stenosis Of Other Cerebral Artery                                                 |

|           |       |                   |       |                                                                                                                                  |
|-----------|-------|-------------------|-------|----------------------------------------------------------------------------------------------------------------------------------|
| Diagnosis | I636  | Ischemic stroke   | ICD10 | Cerebral Infarction Due To Cerebral Venous Thrombosis, Nonpyogenic Or Cerebral Infrc Due To Cerebral Venous Thombos, Nonpyogenic |
| Diagnosis | I638  | Ischemic stroke   | ICD10 | Other Cerebral Infarction                                                                                                        |
| Diagnosis | I639  | Ischemic stroke   | ICD10 | Cerebral Infarction, Unspecified                                                                                                 |
| Diagnosis | I6789 | Ischemic stroke   | ICD10 | Other Cerebrovascular Disease                                                                                                    |
| Diagnosis | 436   | Ischemic stroke   | ICD9  | Cva                                                                                                                              |
| Diagnosis | 43301 | Ischemic stroke   | ICD9  | Ocl Bslr Art W Infrc                                                                                                             |
| Diagnosis | 43311 | Ischemic stroke   | ICD9  | Ocl Crtd Art W Infrc                                                                                                             |
| Diagnosis | 43321 | Ischemic stroke   | ICD9  | Ocl Vrtb Art W Infrc                                                                                                             |
| Diagnosis | 43331 | Ischemic stroke   | ICD9  | Ocl Mlt Bi Art W Infrc                                                                                                           |
| Diagnosis | 43381 | Ischemic stroke   | ICD9  | Ocl Spcf Art W Infrc                                                                                                             |
| Diagnosis | 43391 | Ischemic stroke   | ICD9  | Ocl Art Nos W Infrc                                                                                                              |
| Diagnosis | 43401 | Ischemic stroke   | ICD9  | Crbl Thrmb W Infrc                                                                                                               |
| Diagnosis | 43411 | Ischemic stroke   | ICD9  | Crbl Emblsm W Infrc                                                                                                              |
| Diagnosis | 43491 | Ischemic stroke   | ICD9  | Crbl Art Ocl Nos W Infrc                                                                                                         |
| Diagnosis | 4441  | Systemic Embolism | 9     | thoracic aortic embolism                                                                                                         |
| Diagnosis | 44401 | Systemic Embolism | 9     | saddle embolus abd aorta                                                                                                         |
| Diagnosis | 44489 | Systemic Embolism | 9     | arterial embolism nec                                                                                                            |
| Diagnosis | 44421 | Systemic Embolism | 9     | upper extremity embolism                                                                                                         |
| Diagnosis | 44502 | Systemic Embolism | 9     | atheroembolism,lower ext                                                                                                         |
| Diagnosis | 44481 | Systemic Embolism | 9     | iliac artery embolism                                                                                                            |
| Diagnosis | 44589 | Systemic Embolism | 9     | atheroembolism, site nec                                                                                                         |
| Diagnosis | 4440  | Systemic Embolism | 9     | abd aortic embolism                                                                                                              |
| Diagnosis | 44409 | Systemic Embolism | 9     | ot art emb/thrm abd aort                                                                                                         |

|           |        |                   |    |                                                                                                                                   |
|-----------|--------|-------------------|----|-----------------------------------------------------------------------------------------------------------------------------------|
| Diagnosis | 44422  | Systemic Embolism | 9  | lower extremity embolism                                                                                                          |
| Diagnosis | 44501  | Systemic Embolism | 9  | atheroembolism,upper ext                                                                                                          |
| Diagnosis | 44581  | Systemic Embolism | 9  | atheroembolism, kidney                                                                                                            |
| Diagnosis | 4449   | Systemic Embolism | 9  | arterial embolism nos                                                                                                             |
| Diagnosis | I745   | Systemic Embolism | 10 | embolism and thrombosis of iliac artery                                                                                           |
| Diagnosis | I75012 | Systemic Embolism | 10 | atheroembolism of left upper extremity                                                                                            |
| Diagnosis | I7411  | Systemic Embolism | 10 | embolism and thrombosis of thoracic aorta                                                                                         |
| Diagnosis | I7401  | Systemic Embolism | 10 | saddle embolus of abdominal aorta                                                                                                 |
| Diagnosis | I7581  | Systemic Embolism | 10 | atheroembolism of kidney                                                                                                          |
| Diagnosis | I75022 | Systemic Embolism | 10 | atheroembolism of left lower extremity                                                                                            |
| Diagnosis | I748   | Systemic Embolism | 10 | embolism and thrombosis of other arteries                                                                                         |
| Diagnosis | I7589  | Systemic Embolism | 10 | atheroembolism of other site                                                                                                      |
| Diagnosis | I7409  | Systemic Embolism | 10 | other arterial embolism and thrombosis of abdominal aorta                                                                         |
| Diagnosis | I75021 | Systemic Embolism | 10 | atheroembolism of right lower extremity                                                                                           |
| Diagnosis | I75023 | Systemic Embolism | 10 | atheroembolism of bilateral lower extremities                                                                                     |
| Diagnosis | I75029 | Systemic Embolism | 10 | atheroembolism of unspecified lower extremity                                                                                     |
| Diagnosis | I7410  | Systemic Embolism | 10 | embolism and thrombosis of unspecified parts of aorta                                                                             |
| Diagnosis | I744   | Systemic Embolism | 10 | embolism and thrombosis of arteries of extremities, unsp or<br>embolism and thrombosis of arteries of extremities,<br>unspecified |
| Diagnosis | I75013 | Systemic Embolism | 10 | atheroembolism of bilateral upper extremities                                                                                     |
| Diagnosis | I7419  | Systemic Embolism | 10 | embolism and thrombosis of other parts of aorta                                                                                   |
| Diagnosis | I75011 | Systemic Embolism | 10 | atheroembolism of right upper extremity                                                                                           |
| Diagnosis | I75019 | Systemic Embolism | 10 | atheroembolism of unspecified upper extremity                                                                                     |
| Diagnosis | I743   | Systemic Embolism | 10 | embolism and thrombosis of arteries of the lower extremities                                                                      |

|           |       |                   |    |                                                              |
|-----------|-------|-------------------|----|--------------------------------------------------------------|
| Diagnosis | I749  | Systemic Embolism | 10 | embolism and thrombosis of unspecified artery                |
| Diagnosis | I742  | Systemic Embolism | 10 | embolism and thrombosis of arteries of the upper extremities |
| Diagnosis | 53241 | Major Bleeding    | 9  | chr duoden ulc hem-obstr                                     |
| Diagnosis | 53341 | Major Bleeding    | 9  | chr peptic ulc w hem-obs                                     |
| Diagnosis | 5693  | Major Bleeding    | 9  | rectal & anal hemorrhage                                     |
| Diagnosis | 53160 | Major Bleeding    | 9  | chr stomach ulc hem/perf                                     |
| Diagnosis | 53420 | Major Bleeding    | 9  | ac margin ulc w hem/perf                                     |
| Diagnosis | 53121 | Major Bleeding    | 9  | ac stom ulc hem/perf-obs                                     |
| Diagnosis | 53561 | Major Bleeding    | 9  | duodenitis w hmrhg                                           |
| Diagnosis | 56202 | Major Bleeding    | 9  | dvtclo sml int w hmrhg                                       |
| Diagnosis | 53221 | Major Bleeding    | 9  | ac duod ulc hem/perf-obs                                     |
| Diagnosis | 53461 | Major Bleeding    | 9  | chr marg ulc hem/perf-ob                                     |
| Diagnosis | 56203 | Major Bleeding    | 9  | dvtcli sml int w hmrhg                                       |
| Diagnosis | 53260 | Major Bleeding    | 9  | chr duoden ulc hem/perf                                      |
| Diagnosis | 53521 | Major Bleeding    | 9  | gstr mcsl hypert w hmrg                                      |
| Diagnosis | 53401 | Major Bleeding    | 9  | ac margin ulc w hem-obst                                     |
| Diagnosis | 53321 | Major Bleeding    | 9  | ac pept ulc hem/perf-obs                                     |
| Diagnosis | 53101 | Major Bleeding    | 9  | ac stomach ulc w hem-obst                                    |
| Diagnosis | 53200 | Major Bleeding    | 9  | ac duodenal ulcer w hem                                      |
| Diagnosis | 53140 | Major Bleeding    | 9  | chr stomach ulc w hem                                        |
| Diagnosis | 53531 | Major Bleeding    | 9  | alchl gastritis w hmrhg                                      |
| Diagnosis | 53440 | Major Bleeding    | 9  | chr marginal ulcer w hem                                     |
| Diagnosis | 53301 | Major Bleeding    | 9  | ac peptic ulc w hem-obst                                     |

|           |       |                |   |                          |
|-----------|-------|----------------|---|--------------------------|
| Diagnosis | 53261 | Major Bleeding | 9 | chr duod ulc hem/perf-ob |
| Diagnosis | 53240 | Major Bleeding | 9 | chr duoden ulcer w hem   |
| Diagnosis | 53441 | Major Bleeding | 9 | chr margin ulc w hem-obs |
| Diagnosis | 53340 | Major Bleeding | 9 | chr peptic ulcer w hem   |
| Diagnosis | 5780  | Major Bleeding | 9 | hematemesis              |
| Diagnosis | 5781  | Major Bleeding | 9 | blood in stool           |
| Diagnosis | 53141 | Major Bleeding | 9 | chr stom ulc w hem-obstr |
| Diagnosis | 53551 | Major Bleeding | 9 | gstr/ddnts nos w hmrhg   |
| Diagnosis | 53421 | Major Bleeding | 9 | ac marg ulc hem/perf-obs |
| Diagnosis | 53400 | Major Bleeding | 9 | ac marginal ulcer w hem  |
| Diagnosis | 53360 | Major Bleeding | 9 | chr pept ulc w hem/perf  |
| Diagnosis | 53460 | Major Bleeding | 9 | chr margin ulc hem/perf  |
| Diagnosis | 53082 | Major Bleeding | 9 | esophageal hemorrhage    |
| Diagnosis | 53220 | Major Bleeding | 9 | ac duoden ulc w hem/perf |
| Diagnosis | 53501 | Major Bleeding | 9 | acute gastritis w hmrhg  |
| Diagnosis | 53783 | Major Bleeding | 9 | angio stm/dudn w hmrhg   |
| Diagnosis | 53300 | Major Bleeding | 9 | ac peptic ulcer w hemorr |
| Diagnosis | 4560  | Major Bleeding | 9 | esophag varices w bleed  |
| Diagnosis | 53361 | Major Bleeding | 9 | chr pept ulc hem/perf-ob |
| Diagnosis | 5789  | Major Bleeding | 9 | gastrointest hemorr nos  |
| Diagnosis | 53320 | Major Bleeding | 9 | ac peptic ulc w hem/perf |
| Diagnosis | 53201 | Major Bleeding | 9 | ac duoden ulc w hem-obst |
| Diagnosis | 45620 | Major Bleeding | 9 | bleed esoph var oth dis  |

|           |        |                |    |                                                                                                                                                                                                                                                                 |
|-----------|--------|----------------|----|-----------------------------------------------------------------------------------------------------------------------------------------------------------------------------------------------------------------------------------------------------------------|
| Diagnosis | 53511  | Major Bleeding | 9  | atrph gastritis w hmrhg                                                                                                                                                                                                                                         |
| Diagnosis | 53161  | Major Bleeding | 9  | chr stom ulc hem/perf-ob                                                                                                                                                                                                                                        |
| Diagnosis | 56881  | Major Bleeding | 9  | hemoperitoneum                                                                                                                                                                                                                                                  |
| Diagnosis | 56213  | Major Bleeding | 9  | dvtcli colon w hmrhg                                                                                                                                                                                                                                            |
| Diagnosis | 56985  | Major Bleeding | 9  | angio intes w hmrhg                                                                                                                                                                                                                                             |
| Diagnosis | 53120  | Major Bleeding | 9  | ac stomach ulc w hem/perf                                                                                                                                                                                                                                       |
| Diagnosis | 53541  | Major Bleeding | 9  | oth spf gastrt w hmrhg                                                                                                                                                                                                                                          |
| Diagnosis | 56212  | Major Bleeding | 9  | dvtclo colon w hmrhg                                                                                                                                                                                                                                            |
| Diagnosis | 53100  | Major Bleeding | 9  | ac stomach ulcer w hem                                                                                                                                                                                                                                          |
| Diagnosis | K5733  | Major Bleeding | 10 | diverticulitis of large intestine without perforation or abscess with bleeding or dvtcli of lg int w/o perforation or abscess w bleeding                                                                                                                        |
| Diagnosis | K91841 | Major Bleeding | 10 | postproc hemor/hemtom of a dgstv sys org fol oth procedure or postprocedural hemorrhage and hematoma of a digestive system organ or structure following other procedure or postprocedural hemorrhage of a digestive system organ or structure following other p |
| Diagnosis | K661   | Major Bleeding | 10 | hemoperitoneum                                                                                                                                                                                                                                                  |
| Diagnosis | K5731  | Major Bleeding | 10 | diverticulosis of large intestine without perforation or abscess with bleeding or dvtclos of lg int w/o perforation or abscess w bleeding                                                                                                                       |
| Diagnosis | K2981  | Major Bleeding | 10 | duodenitis with bleeding                                                                                                                                                                                                                                        |
| Diagnosis | K9162  | Major Bleeding | 10 | intraop hemor/hemtom of a dgstv sys org comp oth procedure or intraoperative hemorrhage and hematoma of a digestive system organ or structure complicating other procedure                                                                                      |
| Diagnosis | K282   | Major Bleeding | 10 | acute gastrojejunal ulcer w both hemorrhage and perforation or acute gastrojejunal ulcer with both hemorrhage and perforation                                                                                                                                   |
| Diagnosis | K5753  | Major Bleeding | 10 | diverticulitis of both small and large intestine without perforation or abscess with bleeding or dvtcli of both small and lg int w/o perf or abscess w bleed                                                                                                    |
| Diagnosis | K2961  | Major Bleeding | 10 | other gastritis with bleeding                                                                                                                                                                                                                                   |
| Diagnosis | K226   | Major Bleeding | 10 | gastro-esophageal laceration-hemorrhage syndrome                                                                                                                                                                                                                |



|           |        |                |    |                                                                                                                                                                                                                                                                 |
|-----------|--------|----------------|----|-----------------------------------------------------------------------------------------------------------------------------------------------------------------------------------------------------------------------------------------------------------------|
| Diagnosis | K921   | Major Bleeding | 10 | melena                                                                                                                                                                                                                                                          |
| Diagnosis | K5721  | Major Bleeding | 10 | diverticulitis of large intestine with perforation and abscess with bleeding or dvtrcli of lg int w perforation and abscess w bleeding                                                                                                                          |
| Diagnosis | K260   | Major Bleeding | 10 | acute duodenal ulcer with hemorrhage                                                                                                                                                                                                                            |
| Diagnosis | K91840 | Major Bleeding | 10 | postproc hemor/hemtom of dgstv sys org fol a dgstv sys proc or postprocedural hemorrhage and hematoma of a digestive system organ or structure following a digestive system procedure or postprocedural hemorrhage of a digestive system organ or structure fol |
| Diagnosis | K274   | Major Bleeding | 10 | chronic or unsp peptic ulcer, site unsp, with hemorrhage or chronic or unspecified peptic ulcer, site unspecified, with hemorrhage                                                                                                                              |
| Diagnosis | K272   | Major Bleeding | 10 | acute peptic ulcer, site unsp, w both hemorrhage and perf or acute peptic ulcer, site unspecified, with both hemorrhage and perforation                                                                                                                         |
| Diagnosis | K264   | Major Bleeding | 10 | chronic or unspecified duodenal ulcer with hemorrhage                                                                                                                                                                                                           |
| Diagnosis | K5741  | Major Bleeding | 10 | diverticulitis of both small and large intestine with perforation and abscess with bleeding or dvtrcli of both small and lg int w perf and abscess w bleed                                                                                                      |
| Diagnosis | K266   | Major Bleeding | 10 | chronic or unsp duodenal ulcer w both hemorrhage and perf or chronic or unspecified duodenal ulcer with both hemorrhage and perforation                                                                                                                         |
| Diagnosis | K262   | Major Bleeding | 10 | acute duodenal ulcer with both hemorrhage and perforation                                                                                                                                                                                                       |
| Diagnosis | K2931  | Major Bleeding | 10 | chronic superficial gastritis with bleeding                                                                                                                                                                                                                     |
| Diagnosis | K2951  | Major Bleeding | 10 | unspecified chronic gastritis with bleeding                                                                                                                                                                                                                     |
| Diagnosis | K5701  | Major Bleeding | 10 | diverticulitis of small intestine with perforation and abscess with bleeding or dvtrcli of sm int w perforation and abscess w bleeding                                                                                                                          |
| Diagnosis | I8511  | Major Bleeding | 10 | secondary esophageal varices with bleeding                                                                                                                                                                                                                      |
| Diagnosis | K5713  | Major Bleeding | 10 | diverticulitis of small intestine without perforation or abscess with bleeding or dvtrcli of sm int w/o perforation or abscess w bleeding                                                                                                                       |
| Diagnosis | K286   | Major Bleeding | 10 | chronic or unsp gastrojejunal ulcer w both hemor and perf or chronic or unspecified gastrojejunal ulcer with both hemorrhage and perforation                                                                                                                    |
| Diagnosis | K5751  | Major Bleeding | 10 | diverticulosis of both small and large intestine without perforation or abscess with bleeding or dvrtclos of both small and lg int w/o perf or abscs w bleed                                                                                                    |

|           |        |                |    |                                                                                                                                                                                                                                                                |
|-----------|--------|----------------|----|----------------------------------------------------------------------------------------------------------------------------------------------------------------------------------------------------------------------------------------------------------------|
| Diagnosis | K920   | Major Bleeding | 10 | hematemesis                                                                                                                                                                                                                                                    |
| Diagnosis | K2921  | Major Bleeding | 10 | alcoholic gastritis with bleeding                                                                                                                                                                                                                              |
| Diagnosis | K284   | Major Bleeding | 10 | chronic or unspecified gastrojejunal ulcer with hemorrhage                                                                                                                                                                                                     |
| Diagnosis | K5793  | Major Bleeding | 10 | diverticulitis of intestine, part unspecified, without perforation or abscess with bleeding or dvtrcli of intest, part unsp, w/o perf or abscess w bleeding                                                                                                    |
| Diagnosis | K2991  | Major Bleeding | 10 | gastroduodenitis, unspecified, with bleeding                                                                                                                                                                                                                   |
| Diagnosis | I8501  | Major Bleeding | 10 | esophageal varices with bleeding                                                                                                                                                                                                                               |
| Diagnosis | K252   | Major Bleeding | 10 | acute gastric ulcer with both hemorrhage and perforation                                                                                                                                                                                                       |
| Diagnosis | K9161  | Major Bleeding | 10 | intraop hemor/hemtom of dgstv sys org comp a dgstv sys proc or intraoperative hemorrhage and hematoma of a digestive system organ or structure complicating a digestive system procedure or intraoperative hemorrhage and hematoma of a digestive system organ |
| Diagnosis | K256   | Major Bleeding | 10 | chronic or unsp gastric ulcer w both hemorrhage and perf or chronic or unspecified gastric ulcer with both hemorrhage and perforation                                                                                                                          |
| Diagnosis | K280   | Major Bleeding | 10 | acute gastrojejunal ulcer with hemorrhage                                                                                                                                                                                                                      |
| Diagnosis | K5791  | Major Bleeding | 10 | diverticulosis of intestine, part unspecified, without perforation or abscess with bleeding or dvtrclos of intest, part unsp, w/o perf or abscess w bleed                                                                                                      |
| Diagnosis | K922   | Major Bleeding | 10 | gastrointestinal hemorrhage, unspecified                                                                                                                                                                                                                       |
| Diagnosis | K2901  | Major Bleeding | 10 | acute gastritis with bleeding                                                                                                                                                                                                                                  |
| Diagnosis | K2971  | Major Bleeding | 10 | gastritis, unspecified, with bleeding                                                                                                                                                                                                                          |
| Diagnosis | K270   | Major Bleeding | 10 | acute peptic ulcer, site unspecified, with hemorrhage                                                                                                                                                                                                          |
| Diagnosis | K3182  | Major Bleeding | 10 | dieulafoy lesion (hemorrhagic) of stomach and duodenum                                                                                                                                                                                                         |
| Diagnosis | K6381  | Major Bleeding | 10 | dieulafoy lesion of intestine                                                                                                                                                                                                                                  |
| Diagnosis | K2211  | Major Bleeding | 10 | ulcer of esophagus with bleeding                                                                                                                                                                                                                               |
| Diagnosis | K254   | Major Bleeding | 10 | chronic or unspecified gastric ulcer with hemorrhage                                                                                                                                                                                                           |
| Diagnosis | K31811 | Major Bleeding | 10 | angiodysplasia of stomach and duodenum with bleeding                                                                                                                                                                                                           |

|           |       |                |    |                                                                                                                                                           |
|-----------|-------|----------------|----|-----------------------------------------------------------------------------------------------------------------------------------------------------------|
| Diagnosis | K276  | Major Bleeding | 10 | chr or unsp peptic ulcer, site unsp, w both hemor and perf or chronic or unspecified peptic ulcer, site unspecified, with both hemorrhage and perforation |
| Diagnosis | K5781 | Major Bleeding | 10 | diverticulitis of intestine, part unspecified, with perforation and abscess with bleeding or dvtrcli of intest, part unsp, w perf and abscess w bleeding  |
| Diagnosis | K2941 | Major Bleeding | 10 | chronic atrophic gastritis with bleeding                                                                                                                  |
| Diagnosis | K5521 | Major Bleeding | 10 | angiodysplasia of colon with hemorrhage                                                                                                                   |
| Diagnosis | K5711 | Major Bleeding | 10 | diverticulosis of small intestine without perforation or abscess with bleeding or dvrtclos of sm int w/o perforation or abscess w bleeding                |
| Diagnosis | K250  | Major Bleeding | 10 | acute gastric ulcer with hemorrhage                                                                                                                       |
| Diagnosis | K625  | Major Bleeding | 10 | hemorrhage of anus and rectum                                                                                                                             |
| Diagnosis | 85246 | Major Bleeding | 9  | extradural hem-coma nos                                                                                                                                   |
| Diagnosis | 85305 | Major Bleeding | 9  | brain hem nec-deep coma                                                                                                                                   |
| Diagnosis | 85204 | Major Bleeding | 9  | subarach hem-prolng coma                                                                                                                                  |
| Diagnosis | 85200 | Major Bleeding | 9  | traum subarachnoid hem                                                                                                                                    |
| Diagnosis | 85222 | Major Bleeding | 9  | subdural hem-brief coma                                                                                                                                   |
| Diagnosis | 85240 | Major Bleeding | 9  | traumatic extradural hem                                                                                                                                  |
| Diagnosis | 4321  | Major Bleeding | 9  | subdural hemorrhage                                                                                                                                       |
| Diagnosis | 85303 | Major Bleeding | 9  | brain hem nec-mod coma                                                                                                                                    |
| Diagnosis | 85201 | Major Bleeding | 9  | subarachnoid hem-no coma                                                                                                                                  |
| Diagnosis | 85225 | Major Bleeding | 9  | subdural hem-deep coma                                                                                                                                    |
| Diagnosis | 85249 | Major Bleeding | 9  | extadural hem-concuss                                                                                                                                     |
| Diagnosis | 4329  | Major Bleeding | 9  | intracranial hemorr nos                                                                                                                                   |
| Diagnosis | 85209 | Major Bleeding | 9  | subarach hem-concussion                                                                                                                                   |
| Diagnosis | 85306 | Major Bleeding | 9  | brain hem nec-coma nos                                                                                                                                    |
| Diagnosis | 85245 | Major Bleeding | 9  | extradural hem-deep coma                                                                                                                                  |

|           |         |                |    |                                                                                                                     |
|-----------|---------|----------------|----|---------------------------------------------------------------------------------------------------------------------|
| Diagnosis | 431     | Major Bleeding | 9  | intracerebral hemorrhage                                                                                            |
| Diagnosis | 85300   | Major Bleeding | 9  | traumatic brain hem nec                                                                                             |
| Diagnosis | 85244   | Major Bleeding | 9  | extradur hem-proln coma                                                                                             |
| Diagnosis | 85309   | Major Bleeding | 9  | brain hem nec-concussion                                                                                            |
| Diagnosis | 85243   | Major Bleeding | 9  | extradural hem-mod coma                                                                                             |
| Diagnosis | 85220   | Major Bleeding | 9  | traumatic subdural hem                                                                                              |
| Diagnosis | 85224   | Major Bleeding | 9  | subdural hem-prolng coma                                                                                            |
| Diagnosis | 85241   | Major Bleeding | 9  | extradural hem w/o coma                                                                                             |
| Diagnosis | 85302   | Major Bleeding | 9  | brain hem nec-brief coma                                                                                            |
| Diagnosis | 85203   | Major Bleeding | 9  | subarach hem-mod coma                                                                                               |
| Diagnosis | 85206   | Major Bleeding | 9  | subarach hem-coma nos                                                                                               |
| Diagnosis | 85304   | Major Bleeding | 9  | brain hem nec-proln coma                                                                                            |
| Diagnosis | 4320    | Major Bleeding | 9  | nontraum extradural hem                                                                                             |
| Diagnosis | 85221   | Major Bleeding | 9  | subdural hem w/o coma                                                                                               |
| Diagnosis | 85242   | Major Bleeding | 9  | extradur hem-brief coma                                                                                             |
| Diagnosis | 85226   | Major Bleeding | 9  | subdural hemorr-coma nos                                                                                            |
| Diagnosis | 430     | Major Bleeding | 9  | subarachnoid hemorrhage                                                                                             |
| Diagnosis | 85202   | Major Bleeding | 9  | subarach hem-brief coma                                                                                             |
| Diagnosis | 85205   | Major Bleeding | 9  | subarach hem-deep coma                                                                                              |
| Diagnosis | 85223   | Major Bleeding | 9  | subdural hemorr-mod coma                                                                                            |
| Diagnosis | 85229   | Major Bleeding | 9  | subdural hem-concussion                                                                                             |
| Diagnosis | 85301   | Major Bleeding | 9  | brain hem nec w/o coma                                                                                              |
| Diagnosis | S06347A | Major Bleeding | 10 | traum hemor r cereb w loc w dth d/t brain inj bf consc, init or traumatic hemorrhage of right cerebrum with loss of |

|           |         |                |    |                                                                                                                                                                                                                                                 |
|-----------|---------|----------------|----|-------------------------------------------------------------------------------------------------------------------------------------------------------------------------------------------------------------------------------------------------|
|           |         |                |    | consciousness of any duration with death due to brain injury prior to regaining consciousness, initial encounter                                                                                                                                |
| Diagnosis | S06360A | Major Bleeding | 10 | traum hemor cereb, w/o loss of consciousness, init or traumatic hemorrhage of cerebrum, unspecified, without loss of consciousness, initial encounter                                                                                           |
| Diagnosis | S06354A | Major Bleeding | 10 | traum hemor left cerebrum w loc of 6 hours to 24 hours, init or traumatic hemorrhage of left cerebrum with loss of consciousness of 6 hours to 24 hours, initial encounter                                                                      |
| Diagnosis | I621    | Major Bleeding | 10 | nontraumatic extradural hemorrhage                                                                                                                                                                                                              |
| Diagnosis | S06356A | Major Bleeding | 10 | traum hemor l cereb w loc >24 hr w/o ret consc w surv, init or traumatic hemorrhage of left cerebrum with loss of consciousness greater than 24 hours without return to pre-existing conscious level with patient surviving, initial encounter  |
| Diagnosis | S064X5A | Major Bleeding | 10 | epidural hemorrhage w loc >24 hr w ret consc lev, init or epidural hemorrhage with loss of consciousness greater than 24 hours with return to pre-existing conscious level, initial encounter                                                   |
| Diagnosis | I6001   | Major Bleeding | 10 | nontraumatic subarachnoid hemorrhage from right carotid siphon and bifurcation or ntrm subarach hemor from right carotid siphon and bifurc                                                                                                      |
| Diagnosis | S06346A | Major Bleeding | 10 | traum hemor r cereb w loc >24 hr w/o ret consc w surv, init or traumatic hemorrhage of right cerebrum with loss of consciousness greater than 24 hours without return to pre-existing conscious level with patient surviving, initial encounter |
| Diagnosis | I6000   | Major Bleeding | 10 | nontraumatic subarachnoid hemorrhage from unspecified carotid siphon and bifurcation or ntrm subarach hemorrhage from unsp carotid siphon and bifurc                                                                                            |
| Diagnosis | S06350A | Major Bleeding | 10 | traum hemor left cerebrum w/o loss of consciousness, init or traumatic hemorrhage of left cerebrum without loss of consciousness, initial encounter                                                                                             |
| Diagnosis | I6200   | Major Bleeding | 10 | nontraumatic subdural hemorrhage, unspecified                                                                                                                                                                                                   |
| Diagnosis | S06345A | Major Bleeding | 10 | traum hemor r cereb w loc >24 hr w ret consc lev, init or traumatic hemorrhage of right cerebrum with loss of consciousness greater than 24 hours with return to pre-existing conscious level, initial encounter                                |
| Diagnosis | S065X7A | Major Bleeding | 10 | traum subdr hem w loc w dth d/t brain inj bef reg consc,init or traumatic subdural hemorrhage with loss of consciousness of any duration with death due to brain injury before regaining consciousness, initial encounter                       |
| Diagnosis | I608    | Major Bleeding | 10 | other nontraumatic subarachnoid hemorrhage                                                                                                                                                                                                      |
| Diagnosis | I604    | Major Bleeding | 10 | nontraumatic subarachnoid hemorrhage from basilar artery                                                                                                                                                                                        |

|           |         |                |    |                                                                                                                                                                                                                                |
|-----------|---------|----------------|----|--------------------------------------------------------------------------------------------------------------------------------------------------------------------------------------------------------------------------------|
| Diagnosis | I618    | Major Bleeding | 10 | other nontraumatic intracerebral hemorrhage                                                                                                                                                                                    |
| Diagnosis | S065X0A | Major Bleeding | 10 | traum subdr hem w/o loss of consciousness, init or traumatic subdural hemorrhage without loss of consciousness, initial encounter                                                                                              |
| Diagnosis | I6032   | Major Bleeding | 10 | nontraumatic subarachnoid hemorrhage from left posterior communicating artery or ntrm subarach hemor from left posterior communicating artery                                                                                  |
| Diagnosis | I612    | Major Bleeding | 10 | nontraumatic intracerebral hemorrhage in hemisphere, unsp or nontraumatic intracerebral hemorrhage in hemisphere, unspecified                                                                                                  |
| Diagnosis | S064X3A | Major Bleeding | 10 | epidural hemorrhage w loc of 1-5 hrs 59 min, init or epidural hemorrhage with loss of consciousness of 1 hour to 5 hours 59 minutes, initial encounter                                                                         |
| Diagnosis | I615    | Major Bleeding | 10 | nontraumatic intracerebral hemorrhage, intraventricular                                                                                                                                                                        |
| Diagnosis | S06369A | Major Bleeding | 10 | traum hemor cerebr, w loc of unsp duration, init or traumatic hemorrhage of cerebrum, unspecified, with loss of consciousness of unspecified duration, initial encounter                                                       |
| Diagnosis | I6031   | Major Bleeding | 10 | nontraumatic subarachnoid hemorrhage from right posterior communicating artery or ntrm subarach hemor from right post communicating artery                                                                                     |
| Diagnosis | I606    | Major Bleeding | 10 | nontraumatic subarachnoid hemorrhage from oth intracran art or nontraumatic subarachnoid hemorrhage from other intracranial arteries                                                                                           |
| Diagnosis | S066X7A | Major Bleeding | 10 | traum subrac hem w loc w death d/t brain inj bf consc, init or traumatic subarachnoid hemorrhage with loss of consciousness of any duration with death due to brain injury prior to regaining consciousness, initial encounter |
| Diagnosis | S066X0A | Major Bleeding | 10 | traum subrac hem w/o loss of consciousness, init or traumatic subarachnoid hemorrhage without loss of consciousness, initial encounter                                                                                         |
| Diagnosis | S064X9A | Major Bleeding | 10 | epidural hemorrhage w loc of unsp duration, init or epidural hemorrhage with loss of consciousness of unspecified duration, initial encounter                                                                                  |
| Diagnosis | S06342A | Major Bleeding | 10 | traum hemor right cerebrum w loc of 31-59 min, init or traumatic hemorrhage of right cerebrum with loss of consciousness of 31 minutes to 59 minutes, initial encounter                                                        |
| Diagnosis | S064X6A | Major Bleeding | 10 | epidural hemorrhage w loc >24 hr w/o ret consc w surv, init or epidural hemorrhage with loss of consciousness greater than 24 hours without return to pre-existing conscious level with patient surviving, initial encounter   |
| Diagnosis | S066X1A | Major Bleeding | 10 | traum subrac hem w loc of 30 minutes or less, init or traumatic subarachnoid hemorrhage with loss of consciousness of 30 minutes or less, initial encounter                                                                    |
| Diagnosis | S065X8A | Major Bleeding | 10 | traum subdr hem w loc w dth d/t oth cause bef reg consc,init or traumatic subdural hemorrhage with loss of consciousness                                                                                                       |

|           |         |                |    |                                                                                                                                                                                                                                         |
|-----------|---------|----------------|----|-----------------------------------------------------------------------------------------------------------------------------------------------------------------------------------------------------------------------------------------|
|           |         |                |    | of any duration with death due to other cause before regaining consciousness, initial encounter                                                                                                                                         |
| Diagnosis | S066X6A | Major Bleeding | 10 | traum subrac hem w loc >24 hr w/o ret consc w surv, init or traumatic subarachnoid hemorrhage with loss of consciousness greater than 24 hours without return to pre-existing conscious level with patient surviving, initial encounter |
| Diagnosis | S066X8A | Major Bleeding | 10 | traum subrac hem w loc w death d/t oth cause bf consc, init or traumatic subarachnoid hemorrhage with loss of consciousness of any duration with death due to other cause prior to regaining consciousness, initial encounter           |
| Diagnosis | I6010   | Major Bleeding | 10 | nontraumatic subarachnoid hemorrhage from unspecified middle cerebral artery or ntrm subarach hemorrhage from unsp middle cerebral artery                                                                                               |
| Diagnosis | S064X4A | Major Bleeding | 10 | epidural hemorrhage w loc of 6 hours to 24 hours, init or epidural hemorrhage with loss of consciousness of 6 hours to 24 hours, initial encounter                                                                                      |
| Diagnosis | I607    | Major Bleeding | 10 | nontraumatic subarachnoid hemorrhage from unsp intracran art or nontraumatic subarachnoid hemorrhage from unspecified intracranial artery                                                                                               |
| Diagnosis | I611    | Major Bleeding | 10 | nontraumatic intrcrbl hemorrhage in hemisphere, cortical or nontraumatic intracerebral hemorrhage in hemisphere, cortical                                                                                                               |
| Diagnosis | I613    | Major Bleeding | 10 | nontraumatic intracerebral hemorrhage in brain stem                                                                                                                                                                                     |
| Diagnosis | I6203   | Major Bleeding | 10 | nontraumatic chronic subdural hemorrhage                                                                                                                                                                                                |
| Diagnosis | S066X3A | Major Bleeding | 10 | traum subrac hem w loc of 1-5 hrs 59 min, init or traumatic subarachnoid hemorrhage with loss of consciousness of 1 hour to 5 hours 59 minutes, initial encounter                                                                       |
| Diagnosis | S06357A | Major Bleeding | 10 | traum hemor l cereb w loc w dth d/t brain inj bf consc, init or traumatic hemorrhage of left cerebrum with loss of consciousness of any duration with death due to brain injury prior to regaining consciousness, initial encounter     |
| Diagnosis | S066X9A | Major Bleeding | 10 | traum subrac hem w loc of unsp duration, init or traumatic subarachnoid hemorrhage with loss of consciousness of unspecified duration, initial encounter                                                                                |
| Diagnosis | S06364A | Major Bleeding | 10 | traum hemor cereb, w loc of 6 hours to 24 hours, init or traumatic hemorrhage of cerebrum, unspecified, with loss of consciousness of 6 hours to 24 hours, initial encounter                                                            |
| Diagnosis | S06344A | Major Bleeding | 10 | traum hemor right cerebrum w loc of 6-24 hrs, init or traumatic hemorrhage of right cerebrum with loss of consciousness of 6 hours to 24 hours, initial encounter                                                                       |
| Diagnosis | I609    | Major Bleeding | 10 | nontraumatic subarachnoid hemorrhage, unspecified                                                                                                                                                                                       |
| Diagnosis | S064X0A | Major Bleeding | 10 | epidural hemorrhage w/o loss of consciousness, init encntr or epidural hemorrhage without loss of consciousness, initial encounter                                                                                                      |

|           |         |                |    |                                                                                                                                                                                                                                    |
|-----------|---------|----------------|----|------------------------------------------------------------------------------------------------------------------------------------------------------------------------------------------------------------------------------------|
| Diagnosis | S065X3A | Major Bleeding | 10 | traum subdr hem w loc of 1-5 hrs 59 min, init or traumatic subdural hemorrhage with loss of consciousness of 1 hour to 5 hours 59 minutes, initial encounter                                                                       |
| Diagnosis | S06340A | Major Bleeding | 10 | traum hemor right cerebrum w/o loss of consciousness, init or traumatic hemorrhage of right cerebrum without loss of consciousness, initial encounter                                                                              |
| Diagnosis | I6202   | Major Bleeding | 10 | nontraumatic subacute subdural hemorrhage                                                                                                                                                                                          |
| Diagnosis | S06355A | Major Bleeding | 10 | traum hemor left cerebrum w loc >24 hr w ret consc lev, init or traumatic hemorrhage of left cerebrum with loss of consciousness greater than 24 hours with return to pre-existing conscious level, initial encounter              |
| Diagnosis | I6201   | Major Bleeding | 10 | nontraumatic acute subdural hemorrhage                                                                                                                                                                                             |
| Diagnosis | S066X5A | Major Bleeding | 10 | traum subrac hem w loc >24 hr w ret consc lev, init or traumatic subarachnoid hemorrhage with loss of consciousness greater than 24 hours with return to pre-existing conscious level, initial encounter                           |
| Diagnosis | S065X9A | Major Bleeding | 10 | traum subdr hem w loc of unsp duration, init or traumatic subdural hemorrhage with loss of consciousness of unspecified duration, initial encounter                                                                                |
| Diagnosis | S06358A | Major Bleeding | 10 | traum hemor l cereb w loc w dth d/t oth cause bf consc, init or traumatic hemorrhage of left cerebrum with loss of consciousness of any duration with death due to other cause prior to regaining consciousness, initial encounter |
| Diagnosis | S065X2A | Major Bleeding | 10 | traum subdr hem w loss of consciousness of 31-59 min, init or traumatic subdural hemorrhage with loss of consciousness of 31 minutes to 59 minutes, initial encounter                                                              |
| Diagnosis | S064X7A | Major Bleeding | 10 | epidur hemor w loc w death d/t brain injury bf consc, init or epidural hemorrhage with loss of consciousness of any duration with death due to brain injury prior to regaining consciousness, initial encounter                    |
| Diagnosis | S064X1A | Major Bleeding | 10 | epidural hemorrhage w loc of 30 minutes or less, init or epidural hemorrhage with loss of consciousness of 30 minutes or less, initial encounter                                                                                   |
| Diagnosis | S06362A | Major Bleeding | 10 | traum hemor cereb, w loc of 31-59 min, init or traumatic hemorrhage of cerebrum, unspecified, with loss of consciousness of 31 minutes to 59 minutes, initial encounter                                                            |
| Diagnosis | S06353A | Major Bleeding | 10 | traum hemor left cerebrum w loc of 1-5 hrs 59 minutes, init or traumatic hemorrhage of left cerebrum with loss of consciousness of 1 hours to 5 hours 59 minutes, initial encounter                                                |
| Diagnosis | I614    | Major Bleeding | 10 | nontraumatic intracerebral hemorrhage in cerebellum                                                                                                                                                                                |
| Diagnosis | S064X8A | Major Bleeding | 10 | epidur hemor w loc w death due to oth causes bf consc, init or epidural hemorrhage with loss of consciousness of any                                                                                                               |



|           |         |                |    |                                                                                                                                                                                                                                                         |
|-----------|---------|----------------|----|---------------------------------------------------------------------------------------------------------------------------------------------------------------------------------------------------------------------------------------------------------|
|           |         |                |    | duration with death due to other causes prior to regaining consciousness, initial encounter                                                                                                                                                             |
| Diagnosis | S06348A | Major Bleeding | 10 | traum hemor r cerebr w loc w dth d/t oth cause bf consc, init or traumatic hemorrhage of right cerebrum with loss of consciousness of any duration with death due to other cause prior to regaining consciousness, initial encounter                    |
| Diagnosis | S06351A | Major Bleeding | 10 | traum hemor left cerebrum w loc of 30 minutes or less, init or traumatic hemorrhage of left cerebrum with loss of consciousness of 30 minutes or less, initial encounter                                                                                |
| Diagnosis | S06366A | Major Bleeding | 10 | traum hemor cerebr, w loc >24 hr w/o ret consc w surv, init or traumatic hemorrhage of cerebrum, unspecified, with loss of consciousness greater than 24 hours without return to pre-existing conscious level with patient surviving, initial encounter |
| Diagnosis | I6052   | Major Bleeding | 10 | nontraumatic subarachnoid hemorrhage from l verteb art or nontraumatic subarachnoid hemorrhage from left vertebral artery                                                                                                                               |
| Diagnosis | S06361A | Major Bleeding | 10 | traum hemor cerebr, w loc of 30 minutes or less, init or traumatic hemorrhage of cerebrum, unspecified, with loss of consciousness of 30 minutes or less, initial encounter                                                                             |
| Diagnosis | S065X1A | Major Bleeding | 10 | traum subdr hem w loc of 30 minutes or less, init or traumatic subdural hemorrhage with loss of consciousness of 30 minutes or less, initial encounter                                                                                                  |
| Diagnosis | I610    | Major Bleeding | 10 | nontraumatic intrcbrl hemorrhage in hemisphere, subcortical or nontraumatic intracerebral hemorrhage in hemisphere, subcortical                                                                                                                         |
| Diagnosis | S06349A | Major Bleeding | 10 | traum hemor right cerebrum w loc of unsp duration, init or traumatic hemorrhage of right cerebrum with loss of consciousness of unspecified duration, initial encounter                                                                                 |
| Diagnosis | I6011   | Major Bleeding | 10 | nontraumatic subarachnoid hemorrhage from right middle cerebral artery or ntrm subarach hemorrhage from right middle cerebral artery                                                                                                                    |
| Diagnosis | I6030   | Major Bleeding | 10 | nontraumatic subarachnoid hemorrhage from unspecified posterior communicating artery or ntrm subarach hemor from unsp posterior communicating artery                                                                                                    |
| Diagnosis | S06359A | Major Bleeding | 10 | traum hemor left cerebrum w loc of unsp duration, init or traumatic hemorrhage of left cerebrum with loss of consciousness of unspecified duration, initial encounter                                                                                   |
| Diagnosis | S065X5A | Major Bleeding | 10 | traum subdr hem w loc >24 hr w ret consc lev, init or traumatic subdural hemorrhage with loss of consciousness greater than 24 hours with return to pre-existing conscious level, initial encounter                                                     |
| Diagnosis | S06343A | Major Bleeding | 10 | traum hemor right cerebrum w loc of 1-5 hrs 59 minutes, init or traumatic hemorrhage of right cerebrum with loss of consciousness of 1 hours to 5 hours 59 minutes, initial encounter                                                                   |

|           |         |                |    |                                                                                                                                                                                                                                             |
|-----------|---------|----------------|----|---------------------------------------------------------------------------------------------------------------------------------------------------------------------------------------------------------------------------------------------|
| Diagnosis | S066X4A | Major Bleeding | 10 | traum subrac hem w loc of 6 hours to 24 hours, init or traumatic subarachnoid hemorrhage with loss of consciousness of 6 hours to 24 hours, initial encounter                                                                               |
| Diagnosis | S066X2A | Major Bleeding | 10 | traum subrac hem w loss of consciousness of 31-59 min, init or traumatic subarachnoid hemorrhage with loss of consciousness of 31 minutes to 59 minutes, initial encounter                                                                  |
| Diagnosis | S06363A | Major Bleeding | 10 | traum hemor cereb, w loc of 1-5 hrs 59 minutes, init or traumatic hemorrhage of cerebrum, unspecified, with loss of consciousness of 1 hours to 5 hours 59 minutes, initial encounter                                                       |
| Diagnosis | S064X2A | Major Bleeding | 10 | epidural hemorrhage w loc of 31-59 min, init or epidural hemorrhage with loss of consciousness of 31 minutes to 59 minutes, initial encounter                                                                                               |
| Diagnosis | S06341A | Major Bleeding | 10 | traum hemor right cerebrum w loc of 30 minutes or less, init or traumatic hemorrhage of right cerebrum with loss of consciousness of 30 minutes or less, initial encounter                                                                  |
| Diagnosis | I6012   | Major Bleeding | 10 | nontraumatic subarachnoid hemorrhage from left middle cerebral artery or ntrm subarach hemorrhage from left middle cerebral artery                                                                                                          |
| Diagnosis | I616    | Major Bleeding | 10 | nontraumatic intracerebral hemorrhage, multiple localized                                                                                                                                                                                   |
| Diagnosis | S06365A | Major Bleeding | 10 | traum hemor cereb, w loc >24 hr w ret consc lev, init or traumatic hemorrhage of cerebrum, unspecified, with loss of consciousness greater than 24 hours with return to pre-existing conscious level, initial encounter                     |
| Diagnosis | S065X4A | Major Bleeding | 10 | traum subdr hem w loc of 6 hours to 24 hours, init or traumatic subdural hemorrhage with loss of consciousness of 6 hours to 24 hours, initial encounter                                                                                    |
| Diagnosis | I6050   | Major Bleeding | 10 | nontraumatic subarachnoid hemorrhage from unsp verteb art or nontraumatic subarachnoid hemorrhage from unspecified vertebral artery                                                                                                         |
| Diagnosis | S06367A | Major Bleeding | 10 | traum hemor cereb, w loc w dth d/t brain inj bf consc, init or traumatic hemorrhage of cerebrum, unspecified, with loss of consciousness of any duration with death due to brain injury prior to regaining consciousness, initial encounter |
| Diagnosis | S065X6A | Major Bleeding | 10 | traum subdr hem w loc >24 hr w/o ret consc w surv, init or traumatic subdural hemorrhage with loss of consciousness greater than 24 hours without return to pre-existing conscious level with patient surviving, initial encounter          |
| Diagnosis | S06368A | Major Bleeding | 10 | traum hemor cereb, w loc w dth d/t oth cause bf consc, init or traumatic hemorrhage of cerebrum, unspecified, with loss of consciousness of any duration with death due to other cause prior to regaining consciousness, initial encounter  |
| Diagnosis | I629    | Major Bleeding | 10 | nontraumatic intracranial hemorrhage, unspecified                                                                                                                                                                                           |
| Diagnosis | I602    | Major Bleeding | 10 | nontraumatic subarachnoid hemorrhage from anterior communicating artery                                                                                                                                                                     |

|           |         |                |    |                                                                                                                                                                       |
|-----------|---------|----------------|----|-----------------------------------------------------------------------------------------------------------------------------------------------------------------------|
| Diagnosis | I619    | Major Bleeding | 10 | nontraumatic intracerebral hemorrhage, unspecified                                                                                                                    |
| Diagnosis | I6051   | Major Bleeding | 10 | nontraumatic subarachnoid hemorrhage from r verteb art or nontraumatic subarachnoid hemorrhage from right vertebral artery                                            |
| Diagnosis | I6002   | Major Bleeding | 10 | nontraumatic subarachnoid hemorrhage from left carotid siphon and bifurcation or ntrm subarach hemorrhage from left carotid siphon and bifurc                         |
| Diagnosis | S06352A | Major Bleeding | 10 | traum hemor left cerebrum w loc of 31-59 min, init or traumatic hemorrhage of left cerebrum with loss of consciousness of 31 minutes to 59 minutes, initial encounter |
| Diagnosis | 71916   | Major Bleeding | 9  | hemarthrosis-l/leg                                                                                                                                                    |
| Diagnosis | 78630   | Major Bleeding | 9  | hemoptysis nos                                                                                                                                                        |
| Diagnosis | 6262    | Major Bleeding | 9  | excessive menstruation                                                                                                                                                |
| Diagnosis | 6265    | Major Bleeding | 9  | ovulation bleeding                                                                                                                                                    |
| Diagnosis | 99702   | Major Bleeding | 9  | iatrogen cv infarc/hmrhg                                                                                                                                              |
| Diagnosis | 37632   | Major Bleeding | 9  | orbital hemorrhage                                                                                                                                                    |
| Diagnosis | 78631   | Major Bleeding | 9  | ac idio pul hemrg infant                                                                                                                                              |
| Diagnosis | 36281   | Major Bleeding | 9  | retinal hemorrhage                                                                                                                                                    |
| Diagnosis | 36362   | Major Bleeding | 9  | expulsive choroid hemorr                                                                                                                                              |
| Diagnosis | 2851    | Major Bleeding | 9  | ac posthemorrhag anemia                                                                                                                                               |
| Diagnosis | 78639   | Major Bleeding | 9  | hemoptysis nec                                                                                                                                                        |
| Diagnosis | 9582    | Major Bleeding | 9  | secondary/recur hemorr                                                                                                                                                |
| Diagnosis | 5967    | Major Bleeding | 9  | bladder wall hemorrhage                                                                                                                                               |
| Diagnosis | 59971   | Major Bleeding | 9  | gross hematuria                                                                                                                                                       |
| Diagnosis | 36441   | Major Bleeding | 9  | hyphema                                                                                                                                                               |
| Diagnosis | 59970   | Major Bleeding | 9  | hematuria nos                                                                                                                                                         |
| Diagnosis | 6268    | Major Bleeding | 9  | menstrual disorder nec                                                                                                                                                |
| Diagnosis | 36243   | Major Bleeding | 9  | hem detach pigmnt epith                                                                                                                                               |

|           |       |                |   |                          |
|-----------|-------|----------------|---|--------------------------|
| Diagnosis | 71919 | Major Bleeding | 9 | hemarthrosis-mult jts    |
| Diagnosis | 7848  | Major Bleeding | 9 | hemorrhage from throat   |
| Diagnosis | 71918 | Major Bleeding | 9 | hemarthrosis-jt nec      |
| Diagnosis | 71910 | Major Bleeding | 9 | hemarthrosis-unspec      |
| Diagnosis | 71915 | Major Bleeding | 9 | hemarthrosis-pelvis      |
| Diagnosis | 6267  | Major Bleeding | 9 | postcoital bleeding      |
| Diagnosis | 37481 | Major Bleeding | 9 | hemorrhage of eyelid     |
| Diagnosis | 71913 | Major Bleeding | 9 | hemarthrosis-forearm     |
| Diagnosis | 71912 | Major Bleeding | 9 | hemarthrosis-up/arm      |
| Diagnosis | 59972 | Major Bleeding | 9 | microscopic hematuria    |
| Diagnosis | 4230  | Major Bleeding | 9 | hemopericardium          |
| Diagnosis | 71914 | Major Bleeding | 9 | hemarthrosis-hand        |
| Diagnosis | 7847  | Major Bleeding | 9 | epistaxis                |
| Diagnosis | 6269  | Major Bleeding | 9 | menstrual disorder nos   |
| Diagnosis | 36372 | Major Bleeding | 9 | hemorr choroid detachmnt |
| Diagnosis | 7827  | Major Bleeding | 9 | spontaneous ecchymoses   |
| Diagnosis | 6201  | Major Bleeding | 9 | corpus luteum cyst       |
| Diagnosis | 5997  | Major Bleeding | 9 | hematuria                |
| Diagnosis | 37742 | Major Bleeding | 9 | optic nerve sheath hemor |
| Diagnosis | 37923 | Major Bleeding | 9 | vitreous hemorrhage      |
| Diagnosis | 71917 | Major Bleeding | 9 | hemarthrosis-ankle       |
| Diagnosis | 36361 | Major Bleeding | 9 | choroidal hemorrhage nos |
| Diagnosis | 36043 | Major Bleeding | 9 | hemophthalmos            |

|           |        |                |    |                                                                                                                                                                                                                                                                 |
|-----------|--------|----------------|----|-----------------------------------------------------------------------------------------------------------------------------------------------------------------------------------------------------------------------------------------------------------------|
| Diagnosis | 7863   | Major Bleeding | 9  | hemoptysis                                                                                                                                                                                                                                                      |
| Diagnosis | 99811  | Major Bleeding | 9  | hemorrhage complic proc                                                                                                                                                                                                                                         |
| Diagnosis | 37272  | Major Bleeding | 9  | conjunctival hemorrhage                                                                                                                                                                                                                                         |
| Diagnosis | 71911  | Major Bleeding | 9  | hemarthrosis-shlder                                                                                                                                                                                                                                             |
| Diagnosis | 6214   | Major Bleeding | 9  | hematometra                                                                                                                                                                                                                                                     |
| Diagnosis | 6021   | Major Bleeding | 9  | prostatic congest/hemorr                                                                                                                                                                                                                                        |
| Diagnosis | M25062 | Major Bleeding | 10 | hemarthrosis, left knee                                                                                                                                                                                                                                         |
| Diagnosis | H9521  | Major Bleeding | 10 | intraop hemor/hemtom of ear/mastd comp a proc on ear/mastd or intraoperative hemorrhage and hematoma of ear and mastoid process complicating a procedure on the ear and mastoid process                                                                         |
| Diagnosis | M25032 | Major Bleeding | 10 | hemarthrosis, left wrist                                                                                                                                                                                                                                        |
| Diagnosis | H59313 | Major Bleeding | 10 | postproc hemor/hemtom of eye and adnexa fol an opth proc, bi or postprocedural hemorrhage and hematoma of eye and adnexa following an ophthalmic procedure, bilateral or postprocedural hemorrhage of eye and adnexa following an ophthalmic procedure, bilater |
| Diagnosis | H3563  | Major Bleeding | 10 | retinal hemorrhage, bilateral                                                                                                                                                                                                                                   |
| Diagnosis | N938   | Major Bleeding | 10 | other specified abnormal uterine and vaginal bleeding                                                                                                                                                                                                           |
| Diagnosis | G9751  | Major Bleeding | 10 | postproc hemor/hemtom of a nrv sys org fol a nrv sys proc or postprocedural hemorrhage and hematoma of a nervous system organ or structure following a nervous system procedure or postprocedural hemorrhage of a nervous system organ or structure following a |
| Diagnosis | M96810 | Major Bleeding | 10 | intraop hemor/hemtom of a ms structure comp a ms sys proc or intraoperative hemorrhage and hematoma of a musculoskeletal structure complicating a musculoskeletal system procedure                                                                              |
| Diagnosis | H59321 | Major Bleeding | 10 | postproc hemor/hemtom of right eye and adnexa fol oth proc or postprocedural hemorrhage and hematoma of right eye and adnexa following other procedure or postprocedural hemorrhage of right eye and adnexa following other procedure                           |
| Diagnosis | E3601  | Major Bleeding | 10 | intraop hemor/hemtom of endo sys org comp an endo sys proc or intraoperative hemorrhage and hematoma of an endocrine system organ or structure complicating an endocrine system procedure                                                                       |

|           |        |                |    |                                                                                                                                                                                                                                                                 |
|-----------|--------|----------------|----|-----------------------------------------------------------------------------------------------------------------------------------------------------------------------------------------------------------------------------------------------------------------|
| Diagnosis | I97411 | Major Bleeding | 10 | intraop hemor/hemtom of a circ sys org comp card bypass or intraoperative hemorrhage and hematoma of a circulatory system organ or structure complicating a cardiac bypass                                                                                      |
| Diagnosis | M25052 | Major Bleeding | 10 | hemarthrosis, left hip                                                                                                                                                                                                                                          |
| Diagnosis | R319   | Major Bleeding | 10 | hematuria, unspecified                                                                                                                                                                                                                                          |
| Diagnosis | L7601  | Major Bleeding | 10 | intraop hemor/hemtom of skin, subcu comp a dermatologic proc or intraoperative hemorrhage and hematoma of skin and subcutaneous tissue complicating a dermatologic procedure                                                                                    |
| Diagnosis | M2508  | Major Bleeding | 10 | hemarthrosis, other specified site                                                                                                                                                                                                                              |
| Diagnosis | H44819 | Major Bleeding | 10 | hemophthalmos, unspecified eye                                                                                                                                                                                                                                  |
| Diagnosis | H1133  | Major Bleeding | 10 | conjunctival hemorrhage, bilateral                                                                                                                                                                                                                              |
| Diagnosis | L7621  | Major Bleeding | 10 | postproc hemor/hemtom of skin, subcu fol a dermatologic proc or postprocedural hemorrhage and hematoma of skin and subcutaneous tissue following a dermatologic procedure or postprocedural hemorrhage of skin and subcutaneous tissue following a dermatologic |
| Diagnosis | D62    | Major Bleeding | 10 | acute posthemorrhagic anemia                                                                                                                                                                                                                                    |
| Diagnosis | M96830 | Major Bleeding | 10 | postproc hemor/hemtom of a ms structure fol a ms sys proc or postprocedural hemorrhage and hematoma of a musculoskeletal structure following a musculoskeletal system procedure or postprocedural hemorrhage of a musculoskeletal structure following a musculo |
| Diagnosis | H35731 | Major Bleeding | 10 | hemorrhagic detach of retinal pigment epithelium, right eye or hemorrhagic detachment of retinal pigment epithelium, right eye                                                                                                                                  |
| Diagnosis | D7822  | Major Bleeding | 10 | postproc hemor/hemtom of the spleen following oth procedure or postprocedural hemorrhage and hematoma of the spleen following other procedure or postprocedural hemorrhage of the spleen following other procedure                                              |
| Diagnosis | H2100  | Major Bleeding | 10 | hyphema, unspecified eye                                                                                                                                                                                                                                        |
| Diagnosis | L7622  | Major Bleeding | 10 | postproc hemor/hemtom of skin, subcu following oth procedure or postprocedural hemorrhage and hematoma of skin and subcutaneous tissue following other procedure or postprocedural hemorrhage of skin and subcutaneous tissue following other procedure         |
| Diagnosis | J9562  | Major Bleeding | 10 | intraop hemor/hemtom of a resp sys org comp oth procedure or intraoperative hemorrhage and hematoma of a respiratory system organ or structure complicating other procedure                                                                                     |
| Diagnosis | H05232 | Major Bleeding | 10 | hemorrhage of left orbit                                                                                                                                                                                                                                        |

|           |        |                |    |                                                                                                                                                                                                                                                                |
|-----------|--------|----------------|----|----------------------------------------------------------------------------------------------------------------------------------------------------------------------------------------------------------------------------------------------------------------|
| Diagnosis | H3562  | Major Bleeding | 10 | retinal hemorrhage, left eye                                                                                                                                                                                                                                   |
| Diagnosis | R233   | Major Bleeding | 10 | spontaneous ecchymoses                                                                                                                                                                                                                                         |
| Diagnosis | D7821  | Major Bleeding | 10 | postprocedural hemor/hemtom of the spleen fol proc on spleen or postprocedural hemorrhage and hematoma of the spleen following a procedure on the spleen or postprocedural hemorrhage of the spleen following a procedure on the spleen                        |
| Diagnosis | M25072 | Major Bleeding | 10 | hemarthrosis, left ankle                                                                                                                                                                                                                                       |
| Diagnosis | L7602  | Major Bleeding | 10 | intraop hemor/hemtom of skin, subcu comp oth procedure or intraoperative hemorrhage and hematoma of skin and subcutaneous tissue complicating other procedure                                                                                                  |
| Diagnosis | H47021 | Major Bleeding | 10 | hemorrhage in optic nerve sheath, right eye                                                                                                                                                                                                                    |
| Diagnosis | M25071 | Major Bleeding | 10 | hemarthrosis, right ankle                                                                                                                                                                                                                                      |
| Diagnosis | H4310  | Major Bleeding | 10 | vitreous hemorrhage, unspecified eye                                                                                                                                                                                                                           |
| Diagnosis | H47022 | Major Bleeding | 10 | hemorrhage in optic nerve sheath, left eye                                                                                                                                                                                                                     |
| Diagnosis | H35739 | Major Bleeding | 10 | hemorrhagic detach of retinal pigment epithelium, unsp eye or hemorrhagic detachment of retinal pigment epithelium, unspecified eye                                                                                                                            |
| Diagnosis | N99820 | Major Bleeding | 10 | postproc hemor/hemtom of a gu sys org fol a gu sys procedure or postprocedural hemorrhage and hematoma of a genitourinary system organ or structure following a genitourinary system procedure or postprocedural hemorrhage of a genitourinary system organ or |
| Diagnosis | H59121 | Major Bleeding | 10 | intraop hemor/hemtom of right eye and adnexa comp oth proc or intraoperative hemorrhage and hematoma of right eye and adnexa complicating other procedure                                                                                                      |
| Diagnosis | N897   | Major Bleeding | 10 | hematocolpos                                                                                                                                                                                                                                                   |
| Diagnosis | H31303 | Major Bleeding | 10 | unspecified choroidal hemorrhage, bilateral                                                                                                                                                                                                                    |
| Diagnosis | M25029 | Major Bleeding | 10 | hemarthrosis, unspecified elbow                                                                                                                                                                                                                                |
| Diagnosis | M25076 | Major Bleeding | 10 | hemarthrosis, unspecified foot                                                                                                                                                                                                                                 |
| Diagnosis | H35732 | Major Bleeding | 10 | hemorrhagic detach of retinal pigment epithelium, left eye or hemorrhagic detachment of retinal pigment epithelium, left eye                                                                                                                                   |
| Diagnosis | N939   | Major Bleeding | 10 | abnormal uterine and vaginal bleeding, unspecified                                                                                                                                                                                                             |
| Diagnosis | R040   | Major Bleeding | 10 | epistaxis                                                                                                                                                                                                                                                      |

|           |        |                |    |                                                                                                                                                                                                                                                                 |
|-----------|--------|----------------|----|-----------------------------------------------------------------------------------------------------------------------------------------------------------------------------------------------------------------------------------------------------------------|
| Diagnosis | H4311  | Major Bleeding | 10 | vitreous hemorrhage, right eye                                                                                                                                                                                                                                  |
| Diagnosis | H3560  | Major Bleeding | 10 | retinal hemorrhage, unspecified eye                                                                                                                                                                                                                             |
| Diagnosis | H59319 | Major Bleeding | 10 | postproc hemor/hemtom of unsp eye and adnx fol an opth proc or postprocedural hemorrhage and hematoma of unspecified eye and adnexa following an ophthalmic procedure or postprocedural hemorrhage of unspecified eye and adnexa following an ophthalmic proced |
| Diagnosis | H31302 | Major Bleeding | 10 | unspecified choroidal hemorrhage, left eye                                                                                                                                                                                                                      |
| Diagnosis | H59113 | Major Bleeding | 10 | intraop hemor/hemtom of eye and adnexa comp an opth proc, bi or intraoperative hemorrhage and hematoma of eye and adnexa complicating an ophthalmic procedure, bilateral                                                                                        |
| Diagnosis | N421   | Major Bleeding | 10 | congestion and hemorrhage of prostate                                                                                                                                                                                                                           |
| Diagnosis | G9752  | Major Bleeding | 10 | postproc hemor/hemtom of a nervous sys org fol oth procedure or postprocedural hemorrhage and hematoma of a nervous system organ or structure following other procedure or postprocedural hemorrhage of a nervous system organ or structure following other pro |
| Diagnosis | M25075 | Major Bleeding | 10 | hemarthrosis, left foot                                                                                                                                                                                                                                         |
| Diagnosis | I97610 | Major Bleeding | 10 | postproc hemor/hemtom of a circ sys org fol a cardiac cath or postprocedural hemorrhage and hematoma of a circulatory system organ or structure following a cardiac catheterization or postprocedural hemorrhage of a circulatory system organ or structure fol |
| Diagnosis | H59312 | Major Bleeding | 10 | postproc hemor/hemtom of l eye and adnexa fol an opth proc or postprocedural hemorrhage and hematoma of left eye and adnexa following an ophthalmic procedure or postprocedural hemorrhage of left eye and adnexa following an ophthalmic procedure             |
| Diagnosis | H59111 | Major Bleeding | 10 | intraop hemor/hemtom of r eye and adnexa comp an opth proc or intraoperative hemorrhage and hematoma of right eye and adnexa complicating an ophthalmic procedure                                                                                               |
| Diagnosis | E89811 | Major Bleeding | 10 | postproc hemor/hemtom of an endo sys org fol oth procedure or postprocedural hemorrhage and hematoma of an endocrine system organ or structure following other procedure or postprocedural hemorrhage of an endocrine system organ or structure following other |
| Diagnosis | E89810 | Major Bleeding | 10 | postproc hemor/hemtom of endo sys org fol an endo sys proc or postprocedural hemorrhage and hematoma of an endocrine system organ or structure following an endocrine system procedure or postprocedural hemorrhage of an endocrine system organ or structure f |



|           |        |                |    |                                                                                                                                                                                                                                                                 |
|-----------|--------|----------------|----|-----------------------------------------------------------------------------------------------------------------------------------------------------------------------------------------------------------------------------------------------------------------|
| Diagnosis | M25073 | Major Bleeding | 10 | hemarthrosis, unspecified ankle                                                                                                                                                                                                                                 |
| Diagnosis | I97410 | Major Bleeding | 10 | intraoperative hemor/hemtom of a circ sys org comp card cath or intraoperative hemorrhage and hematoma of a circulatory system organ or structure complicating a cardiac catheterization                                                                        |
| Diagnosis | M25031 | Major Bleeding | 10 | hemarthrosis, right wrist                                                                                                                                                                                                                                       |
| Diagnosis | J95831 | Major Bleeding | 10 | postproc hemor/hemtom of a resp sys org fol oth procedure or postprocedural hemorrhage and hematoma of a respiratory system organ or structure following other procedure or postprocedural hemorrhage of a respiratory system organ or structure following othe |
| Diagnosis | I312   | Major Bleeding | 10 | hemopericardium, not elsewhere classified                                                                                                                                                                                                                       |
| Diagnosis | M25041 | Major Bleeding | 10 | hemarthrosis, right hand                                                                                                                                                                                                                                        |
| Diagnosis | H44812 | Major Bleeding | 10 | hemophthalmos, left eye                                                                                                                                                                                                                                         |
| Diagnosis | G9732  | Major Bleeding | 10 | intraop hemor/hemtom of a nervous sys org comp oth procedure or intraoperative hemorrhage and hematoma of a nervous system organ or structure complicating other procedure                                                                                      |
| Diagnosis | M25039 | Major Bleeding | 10 | hemarthrosis, unspecified wrist                                                                                                                                                                                                                                 |
| Diagnosis | H2101  | Major Bleeding | 10 | hyphema, right eye                                                                                                                                                                                                                                              |
| Diagnosis | H59119 | Major Bleeding | 10 | intraop hemor/hemtom of unsp eye and adnx comp an ophth proc or intraoperative hemorrhage and hematoma of unspecified eye and adnexa complicating an ophthalmic procedure                                                                                       |
| Diagnosis | H9541  | Major Bleeding | 10 | postproc hemor/hemtom of ear/mastd fol proc on ear/mastd or postprocedural hemorrhage and hematoma of ear and mastoid process following a procedure on the ear and mastoid process or postprocedural hemorrhage of ear and mastoid process following a procedur |
| Diagnosis | H31413 | Major Bleeding | 10 | hemorrhagic choroidal detachment, bilateral                                                                                                                                                                                                                     |
| Diagnosis | H31319 | Major Bleeding | 10 | expulsive choroidal hemorrhage, unspecified eye                                                                                                                                                                                                                 |
| Diagnosis | M25049 | Major Bleeding | 10 | hemarthrosis, unspecified hand                                                                                                                                                                                                                                  |
| Diagnosis | M25022 | Major Bleeding | 10 | hemarthrosis, left elbow                                                                                                                                                                                                                                        |
| Diagnosis | H9522  | Major Bleeding | 10 | intraop hemor/hemtom of ear/mastd complicating oth procedure or intraoperative hemorrhage and hematoma of ear and mastoid process complicating other procedure                                                                                                  |

|           |        |                |    |                                                                                                                                                                                                                                                  |
|-----------|--------|----------------|----|--------------------------------------------------------------------------------------------------------------------------------------------------------------------------------------------------------------------------------------------------|
| Diagnosis | H05233 | Major Bleeding | 10 | hemorrhage of bilateral orbit                                                                                                                                                                                                                    |
| Diagnosis | M25051 | Major Bleeding | 10 | hemarthrosis, right hip                                                                                                                                                                                                                          |
| Diagnosis | H1132  | Major Bleeding | 10 | conjunctival hemorrhage, left eye                                                                                                                                                                                                                |
| Diagnosis | H1131  | Major Bleeding | 10 | conjunctival hemorrhage, right eye                                                                                                                                                                                                               |
| Diagnosis | H31311 | Major Bleeding | 10 | expulsive choroidal hemorrhage, right eye                                                                                                                                                                                                        |
| Diagnosis | H44811 | Major Bleeding | 10 | hemophthalmos, right eye                                                                                                                                                                                                                         |
| Diagnosis | H47029 | Major Bleeding | 10 | hemorrhage in optic nerve sheath, unspecified eye                                                                                                                                                                                                |
| Diagnosis | H9542  | Major Bleeding | 10 | postproc hemor/hemtom of ear/mastd following oth procedure or postprocedural hemorrhage and hematoma of ear and mastoid process following other procedure or postprocedural hemorrhage of ear and mastoid process following other procedure      |
| Diagnosis | H2102  | Major Bleeding | 10 | hyphema, left eye                                                                                                                                                                                                                                |
| Diagnosis | I9742  | Major Bleeding | 10 | intraop hemor/hemtom of a circ sys org comp oth procedure or intraoperative hemorrhage and hematoma of a circulatory system organ or structure complicating other procedure                                                                      |
| Diagnosis | H31313 | Major Bleeding | 10 | expulsive choroidal hemorrhage, bilateral                                                                                                                                                                                                        |
| Diagnosis | G9731  | Major Bleeding | 10 | intraop hemor/hemtom of a nervous sys org comp nrv sys proc or intraoperative hemorrhage and hematoma of a nervous system organ or structure complicating a nervous system procedure                                                             |
| Diagnosis | M25011 | Major Bleeding | 10 | hemarthrosis, right shoulder                                                                                                                                                                                                                     |
| Diagnosis | M25021 | Major Bleeding | 10 | hemarthrosis, right elbow                                                                                                                                                                                                                        |
| Diagnosis | H59123 | Major Bleeding | 10 | intraop hemor/hemtom of eye and adnexa comp oth proc, bi or intraoperative hemorrhage and hematoma of eye and adnexa complicating other procedure, bilateral                                                                                     |
| Diagnosis | H31301 | Major Bleeding | 10 | unspecified choroidal hemorrhage, right eye                                                                                                                                                                                                      |
| Diagnosis | H59329 | Major Bleeding | 10 | postproc hemor/hemtom of unsp eye and adnexa fol oth proc or postprocedural hemorrhage and hematoma of unspecified eye and adnexa following other procedure or postprocedural hemorrhage of unspecified eye and adnexa following other procedure |
| Diagnosis | H59129 | Major Bleeding | 10 | intraop hemor/hemtom of unsp eye and adnexa comp oth proc or intraoperative hemorrhage and hematoma of unspecified eye and adnexa complicating other procedure                                                                                   |

|           |         |                |    |                                                                                                                                                                                                                                                                 |
|-----------|---------|----------------|----|-----------------------------------------------------------------------------------------------------------------------------------------------------------------------------------------------------------------------------------------------------------------|
| Diagnosis | H59122  | Major Bleeding | 10 | intraop hemor/hemtom of left eye and adnexa comp oth proc or intraoperative hemorrhage and hematoma of left eye and adnexa complicating other procedure                                                                                                         |
| Diagnosis | H4312   | Major Bleeding | 10 | vitreous hemorrhage, left eye                                                                                                                                                                                                                                   |
| Diagnosis | T792XXA | Major Bleeding | 10 | traumatic secondary and recurrent hemor and seroma, init or traumatic secondary and recurrent hemorrhage and seroma, initial encounter                                                                                                                          |
| Diagnosis | R049    | Major Bleeding | 10 | hemorrhage from respiratory passages, unspecified                                                                                                                                                                                                               |
| Diagnosis | M25074  | Major Bleeding | 10 | hemarthrosis, right foot                                                                                                                                                                                                                                        |
| Diagnosis | M2500   | Major Bleeding | 10 | hemarthrosis, unspecified joint                                                                                                                                                                                                                                 |
| Diagnosis | E3602   | Major Bleeding | 10 | intraop hemor/hemtom of an endo sys org comp oth procedure or intraoperative hemorrhage and hematoma of an endocrine system organ or structure complicating other procedure                                                                                     |
| Diagnosis | M96811  | Major Bleeding | 10 | intraop hemor/hemtom of a ms structure comp oth procedure or intraoperative hemorrhage and hematoma of a musculoskeletal structure complicating other procedure                                                                                                 |
| Diagnosis | M25042  | Major Bleeding | 10 | hemarthrosis, left hand                                                                                                                                                                                                                                         |
| Diagnosis | I97620  | Major Bleeding | 10 | postprocedural hemorrhage of a circulatory system organ or structure following other procedure                                                                                                                                                                  |
| Diagnosis | R0489   | Major Bleeding | 10 | hemorrhage from other sites in respiratory passages                                                                                                                                                                                                             |
| Diagnosis | M96831  | Major Bleeding | 10 | postproc hemor/hemtom of a ms structure fol oth procedure or postprocedural hemorrhage and hematoma of a musculoskeletal structure following other procedure or postprocedural hemorrhage of a musculoskeletal structure following other procedure              |
| Diagnosis | I97618  | Major Bleeding | 10 | postproc hemor/hemtom of circ sys org fol oth circ sys proc or postprocedural hemorrhage and hematoma of a circulatory system organ or structure following other circulatory system procedure or postprocedural hemorrhage of a circulatory system organ or str |
| Diagnosis | R58     | Major Bleeding | 10 | hemorrhage, not elsewhere classified                                                                                                                                                                                                                            |
| Diagnosis | N9962   | Major Bleeding | 10 | intraop hemor/hemtom of a gu sys org comp oth procedure or intraoperative hemorrhage and hematoma of a genitourinary system organ or structure complicating other procedure                                                                                     |
| Diagnosis | M25061  | Major Bleeding | 10 | hemarthrosis, right knee                                                                                                                                                                                                                                        |
| Diagnosis | D7801   | Major Bleeding | 10 | intraop hemor/hemtom of the spleen comp a proc on the spleen or intraoperative hemorrhage and hematoma of the spleen complicating a procedure on the spleen                                                                                                     |

|           |        |                |    |                                                                                                                                                                                                                                                                 |
|-----------|--------|----------------|----|-----------------------------------------------------------------------------------------------------------------------------------------------------------------------------------------------------------------------------------------------------------------|
| Diagnosis | N9961  | Major Bleeding | 10 | intraop hemor/hemtom of a gu sys org comp a gu sys procedure or intraoperative hemorrhage and hematoma of a genitourinary system organ or structure complicating a genitourinary system procedure                                                               |
| Diagnosis | H59322 | Major Bleeding | 10 | postproc hemor/hemtom of left eye and adnexa fol oth proc or postprocedural hemorrhage and hematoma of left eye and adnexa following other procedure or postprocedural hemorrhage of left eye and adnexa following other procedure                              |
| Diagnosis | H31412 | Major Bleeding | 10 | hemorrhagic choroidal detachment, left eye                                                                                                                                                                                                                      |
| Diagnosis | H05239 | Major Bleeding | 10 | hemorrhage of unspecified orbit                                                                                                                                                                                                                                 |
| Diagnosis | H59311 | Major Bleeding | 10 | postproc hemor/hemtom of r eye and adnexa fol an opth proc or postprocedural hemorrhage and hematoma of right eye and adnexa following an ophthalmic procedure or postprocedural hemorrhage of right eye and adnexa following an ophthalmic procedure           |
| Diagnosis | N857   | Major Bleeding | 10 | hematometra                                                                                                                                                                                                                                                     |
| Diagnosis | H1130  | Major Bleeding | 10 | conjunctival hemorrhage, unspecified eye                                                                                                                                                                                                                        |
| Diagnosis | H2103  | Major Bleeding | 10 | hyphema, bilateral                                                                                                                                                                                                                                              |
| Diagnosis | H31312 | Major Bleeding | 10 | expulsive choroidal hemorrhage, left eye                                                                                                                                                                                                                        |
| Diagnosis | H05231 | Major Bleeding | 10 | hemorrhage of right orbit                                                                                                                                                                                                                                       |
| Diagnosis | N920   | Major Bleeding | 10 | excessive and frequent menstruation with regular cycle                                                                                                                                                                                                          |
| Diagnosis | R310   | Major Bleeding | 10 | gross hematuria                                                                                                                                                                                                                                                 |
| Diagnosis | M25059 | Major Bleeding | 10 | hemarthrosis, unspecified hip                                                                                                                                                                                                                                   |
| Diagnosis | N930   | Major Bleeding | 10 | postcoital and contact bleeding                                                                                                                                                                                                                                 |
| Diagnosis | J95830 | Major Bleeding | 10 | postproc hemor/hemtom of a resp sys org fol a resp sys proc or postprocedural hemorrhage and hematoma of a respiratory system organ or structure following a respiratory system procedure or postprocedural hemorrhage of a respiratory system organ or structu |
| Diagnosis | H31419 | Major Bleeding | 10 | hemorrhagic choroidal detachment, unspecified eye                                                                                                                                                                                                               |
| Diagnosis | J9561  | Major Bleeding | 10 | intraop hemor/hemtom of a resp sys org comp resp sys proc or intraoperative hemorrhage and hematoma of a respiratory system organ or structure complicating a respiratory system procedure                                                                      |

|           |        |                |    |                                                                                                                                                                                                                                                                 |
|-----------|--------|----------------|----|-----------------------------------------------------------------------------------------------------------------------------------------------------------------------------------------------------------------------------------------------------------------|
| Diagnosis | H47023 | Major Bleeding | 10 | hemorrhage in optic nerve sheath, bilateral                                                                                                                                                                                                                     |
| Diagnosis | H4313  | Major Bleeding | 10 | vitreous hemorrhage, bilateral                                                                                                                                                                                                                                  |
| Diagnosis | N923   | Major Bleeding | 10 | ovulation bleeding                                                                                                                                                                                                                                              |
| Diagnosis | I97611 | Major Bleeding | 10 | postproc hemor/hemtom of a circ sys org fol cardiac bypass or postprocedural hemorrhage and hematoma of a circulatory system organ or structure following cardiac bypass or postprocedural hemorrhage of a circulatory system organ or structure following card |
| Diagnosis | H31411 | Major Bleeding | 10 | hemorrhagic choroidal detachment, right eye                                                                                                                                                                                                                     |
| Diagnosis | M25019 | Major Bleeding | 10 | hemarthrosis, unspecified shoulder                                                                                                                                                                                                                              |
| Diagnosis | I97418 | Major Bleeding | 10 | intraop hemor/hemtom of circ sys org comp oth circ sys proc or intraoperative hemorrhage and hematoma of a circulatory system organ or structure complicating other circulatory system procedure                                                                |
| Diagnosis | H31309 | Major Bleeding | 10 | unspecified choroidal hemorrhage, unspecified eye                                                                                                                                                                                                               |
| Diagnosis | M25012 | Major Bleeding | 10 | hemarthrosis, left shoulder                                                                                                                                                                                                                                     |
| Diagnosis | R041   | Major Bleeding | 10 | hemorrhage from throat                                                                                                                                                                                                                                          |
| Diagnosis | H44813 | Major Bleeding | 10 | hemophthalmos, bilateral                                                                                                                                                                                                                                        |
| Diagnosis | N99821 | Major Bleeding | 10 | postproc hemor/hemtom of a gu sys org fol oth procedure or postprocedural hemorrhage and hematoma of a genitourinary system organ or structure following other procedure or postprocedural hemorrhage of a genitourinary system organ or structure following ot |
| Diagnosis | D7802  | Major Bleeding | 10 | intraop hemor/hemtom of the spleen comp oth procedure or intraoperative hemorrhage and hematoma of the spleen complicating other procedure                                                                                                                      |
| Diagnosis | R042   | Major Bleeding | 10 | hemoptysis                                                                                                                                                                                                                                                      |
| Diagnosis | H3561  | Major Bleeding | 10 | retinal hemorrhage, right eye                                                                                                                                                                                                                                   |
| Diagnosis | M25069 | Major Bleeding | 10 | hemarthrosis, unspecified knee                                                                                                                                                                                                                                  |
| Diagnosis | H59323 | Major Bleeding | 10 | postproc hemor/hemtom of eye and adnexa fol oth proc, bi or postprocedural hemorrhage and hematoma of eye and adnexa following other procedure, bilateral or postprocedural hemorrhage of eye and adnexa following other procedure, bilateral                   |

|           |         |                |    |                                                                                                                                                                   |
|-----------|---------|----------------|----|-------------------------------------------------------------------------------------------------------------------------------------------------------------------|
| Diagnosis | H35733  | Major Bleeding | 10 | hemorrhagic detach of retinal pigment epithelium, bilateral or hemorrhagic detachment of retinal pigment epithelium, bilateral                                    |
| Diagnosis | H59112  | Major Bleeding | 10 | intraop hemor/hemtom of 1 eye and adnexa comp an ophth proc or intraoperative hemorrhage and hematoma of left eye and adnexa complicating an ophthalmic procedure |
| Procedure | 4443    | Major Bleeding | 9  | Endoscopic control of gastric or duodenal bleeding                                                                                                                |
| Procedure | 9904    | Major Bleeding | 9  | Transfusion of packed cells                                                                                                                                       |
| Procedure | 30230N1 | Major Bleeding | 10 | Transfusion of Nonautologous Red Blood Cells into Peripheral Vein, Open Approach                                                                                  |
| Procedure | 30230P1 | Major Bleeding | 10 | Transfusion of Nonautologous Frozen Red Cells into Peripheral Vein, Open Approach                                                                                 |
| Procedure | 30233N1 | Major Bleeding | 10 | Transfusion of Nonautologous Red Blood Cells into Peripheral Vein, Percutaneous Approach                                                                          |
| Procedure | 30233P1 | Major Bleeding | 10 | Transfusion of Nonautologous Frozen Red Cells into Peripheral Vein, Percutaneous Approach                                                                         |
| Procedure | 30240N1 | Major Bleeding | 10 | Transfusion of Nonautologous Red Blood Cells into Central Vein, Open Approach                                                                                     |
| Procedure | 30240P1 | Major Bleeding | 10 | Tansfusion of Nonautologous Frozen Red Cells into Central Vein, Open Approach                                                                                     |
| Procedure | 30243N1 | Major Bleeding | 10 | Transfusion of Nonautologous Red Blood Cells into Central Vein, Percutaneous Approach                                                                             |
| Procedure | 30243P1 | Major Bleeding | 10 | Transfusion of Nonautologous Frozen Red Cells into Central Vein, Percutaneous Approach                                                                            |
| Procedure | 30250N1 | Major Bleeding | 10 | Transfusion of Nonautologous Red Blood Cells into Peripheral Artery, Open Approach                                                                                |
| Procedure | 30250P1 | Major Bleeding | 10 | Transfusion of Nonautologous Frozen Red Cells into Peripheral Artery, Open Approach                                                                               |
| Procedure | 30253N1 | Major Bleeding | 10 | Transfusion of Nonautologous Red Blood Cells into Peripheral Artery, Percutaneous Approach                                                                        |
| Procedure | 30253P1 | Major Bleeding | 10 | Transfusion of Nonautologous Frozen Red Cells into Peripheral Artery, Percutaneous Approach                                                                       |
| Procedure | 30260N1 | Major Bleeding | 10 | Transfusion of Nonautologous Red Blood Cells into Central Artery, Open Approach                                                                                   |
| Procedure | 30260P1 | Major Bleeding | 10 | Transfusion of Nonautologous Frozen Red Cells into Central Artery, Open Approach                                                                                  |
| Procedure | 30263N1 | Major Bleeding | 10 | Transfusion of Nonautologous Red Blood Cells into Central Artery, Percutaneous Approach                                                                           |
| Procedure | 30263P1 | Major Bleeding | 10 | Transfusion of Nonautologous Frozen Red Cells into Central Artery, Percutaneous Approach                                                                          |
